# 1 **An Unexpectedly Complex Architecture for Skin Pigmentation in Africans**

2

3 Alicia R Martin<sup>1,2,3,4</sup>, Meng Lin<sup>5</sup>, Julie M Granka<sup>6</sup>, Justin W Myrick<sup>5</sup>, Xiaomin Liu<sup>7</sup>, Alexandra  
4 Sockell<sup>1</sup>, Elizabeth G. Atkinson<sup>5</sup>, Cedric J Werely<sup>9</sup>, Marlo Möller<sup>9</sup>, Manjinder S Sandhu<sup>10</sup>, David  
5 M. Kingsley<sup>8</sup>, Eileen G Hoal<sup>9</sup>, Xiao Liu<sup>7</sup>, Mark J. Daly<sup>2,3,4</sup>, Marcus W Feldman<sup>6</sup>, Christopher R  
6 Gignoux<sup>1</sup>, Carlos D Bustamante<sup>1</sup>, Brenna M Henn<sup>5</sup>

7

8 <sup>1</sup>Department of Genetics, Stanford University, Stanford, CA, 94305; <sup>2</sup>Analytic and Translational  
9 Genetics Unit, Department of Medicine, Massachusetts General Hospital and Harvard Medical  
10 School, Boston, MA 02114; <sup>3</sup>Program in Medical and Population Genetics, Broad Institute,  
11 Cambridge, MA 02141; <sup>4</sup>Stanley Center for Psychiatric Research, Broad Institute, Cambridge,  
12 MA 02141; <sup>5</sup>Department of Ecology and Evolution, SUNY Stony Brook, NY 11794; <sup>6</sup>Department  
13 of Biological Sciences, Stanford University, Stanford, CA, 94305; <sup>7</sup>BGI-Shenzhen, Shenzhen,  
14 China; <sup>8</sup>Department of Developmental Biology, Stanford University, Stanford, California, USA;  
15 <sup>9</sup>SA MRC Centre for Tuberculosis Research, DST/NRF Centre of Excellence for Biomedical  
16 Tuberculosis Research, Division of Molecular Biology and Human Genetics, Faculty of Medicine  
17 and Health Sciences, Stellenbosch University, Tygerberg, South Africa; <sup>10</sup>Wellcome Trust  
18 Sanger Institute, Genome Campus, Hinxton, England.

19

20 Contact Information: [armartin@broadinstitute.org](mailto:armartin@broadinstitute.org) or [brenna.henn@stonybrook.edu](mailto:brenna.henn@stonybrook.edu)

21

22 Key words: pigmentation, human evolution, Africa, heritability, population genetics

23

24 **Summary**

25

1 Fewer than 15 genes have been directly associated with skin pigmentation variation in humans,  
2 leading to its characterization as a relatively simple trait. However, by assembling a global  
3 survey of quantitative skin pigmentation phenotypes, we demonstrate that pigmentation is more  
4 complex than previously assumed with genetic architecture varying by latitude. We investigate  
5 polygenicity in the Khoe and the San, populations indigenous to southern Africa, who have  
6 considerably lighter skin than equatorial Africans. We demonstrate that skin pigmentation is  
7 highly heritable, but that known pigmentation loci explain only a small fraction of the variance.  
8 Rather, baseline skin pigmentation is a complex, polygenic trait in the KhoeSan. Despite this,  
9 we identify canonical and non-canonical skin pigmentation loci, including near *SLC24A5*,  
10 *TYRP1*, *SMARCA2/VLDLR*, and *SNX13* using a genome-wide association approach  
11 complemented by targeted resequencing. By considering diverse, under-studied African  
12 populations, we show how the architecture of skin pigmentation can vary across humans  
13 subject to different local evolutionary pressures.

14

## 15 **Highlights**

- 16 • Skin pigmentation in Africans is far more polygenic than light skin pigmentation in  
17 Eurasians.
- 18 • KhoeSan<sup>§</sup> populations, which diverged early in human prehistory from other populations,  
19 have lightened skin pigmentation compared to equatorial Africans.
- 20 • Skin color is highly heritable in the KhoeSan, but pigmentation variability is not well  
21 explained by previously discovered pigmentation genes.

---

<sup>§</sup> We use the term “KhoeSan” to refer to a diverse array of indigenous populations in southern Africa that carry KhoeSan ancestry and speak Khoe, !Ui-Tuu or Kx’a languages. “KhoeSan” is not accepted by all such communities; where possible we refer to populations by their specific ethnic name. This grouping lumps together populations of different languages, cultures and variable genetic diversity.

- 1 • We perform the first GWAS for pigmentation in African KhoeSan populations and identify  
2 canonical pigmentation loci near *TYRP1* and in *SLC24A5*, as well as novel associations  
3 surrounding *SMARCA2* and other genes.  
4

## 5 **Introduction**

6

7 Skin pigmentation is one of the most strikingly variable and strongly selected phenotypes  
8 among human populations (Sabeti et al., 2007; Sturm and Duffy, 2012), with darker skin  
9 observed closer to the equator and lighter pigmentation observed at high latitudes. Researchers  
10 have hypothesized that variable exposure to ultra violet radiation (UVR) creates opposing  
11 selective forces for vitamin D production and folate protection, resulting in global pigmentation  
12 differentiation (Chaplin and Jablonski, 2009; Jablonski and Chaplin, 2010). Skin pigmentation  
13 differences at similar latitudes and UV exposures indicate that additional evolutionary forces,  
14 such as assortative mating, drift, and epistasis, are also likely to have affected global skin  
15 pigmentation (Wilde et al., 2014; Pośpiech et al., 2014). While ~171 genes have been  
16 implicated in pigmentation variability across model organisms (e.g. the Color Genes database:  
17 <http://www.espcr.org/micemut/>), only ~15 genes have been associated with skin color  
18 differences in humans (**Table 2**). The relative paucity of skin pigmentation loci identified from  
19 GWAS efforts has led to the characterization of pigmentation variation as a relatively simple  
20 trait, with only a handful of SNPs being highly predictive of skin, eye, and hair color across  
21 populations (Hart et al., 2013; Spichenok et al., 2011; Walsh et al., 2013).

22  
23 The genetic basis of skin pigmentation has been primarily studied in Europeans, Asians, and  
24 admixed individuals of western African descent using candidate gene and genome-wide  
25 approaches (Candille et al., 2012; Beleza et al., 2013a; Beleza et al., 2013b; Sulem et al.,  
26 2007; Sulem et al., 2008; Sturm and Duffy, 2012). Remarkably, only one study of quantitative

1 genetic effects on pigmentation in continental Africans has been published to date, despite the  
2 fact that Africans have the greatest range of pigmentation variation globally (Relethford, 2000;  
3 Jablonski and Chaplin, 2014; Crawford et al, 2017). Several adaptive sweeps have occurred at  
4 large-effect skin pigmentation loci in populations from high latitudes, which researchers have  
5 interpreted as resulting from strong environmental selection pressure that reduces variability in  
6 the population. For example, *SLC24A5* is among the best-studied skin pigmentation genes; the  
7 derived Ala111Thr allele (rs1426654) confers the largest known lightening effect and has swept  
8 to fixation in western Eurasian populations (Beleza et al., 2013a; Lamason et al., 2005).  
9 rs35395 near *SLC45A2*, rs10831496 near *GRM5* and *TYR*, and rs4424881 near *APBA2* and  
10 *OCA2* also have different allele frequencies in Europeans and Africans, with high derived  
11 frequencies that confer large skin lightening effects in Europeans (Beleza et al., 2013a; Norton  
12 et al., 2007). Other variants of smaller effect contribute to the relatively narrow variation among  
13 Europeans in skin pigmentation, including associations in/near *MC1R*, *TYR*, *IRF4*, and *ASIP*  
14 (Sulem et al., 2007; Sulem et al., 2008). Several of the largest skin lightening effects in  
15 Europeans and East Asians arose through convergent evolution; for example the His615Arg  
16 amino acid substitution in *OCA2* (rs1800414) has a large functional skin lightening effect  
17 specifically in East Asians (Yang et al., 2016). Some of the same genes have been selected  
18 across Eurasia at high latitudes with evidence of similar (e.g. *KITLG*) (Miller et al., 2007) or  
19 different (*OCA2*) selective sweeps, whereas other genes have been selected/associated with  
20 skin pigmentation in populations living close together at high latitudes, such as *ATRN* and *DCT*  
21 in East Asians (McEvoy et al., 2006; Lao et al., 2007; Edwards et al., 2010) or *SLC45A2*,  
22 *SLC24A5*, and *TYRP1* in Europeans (Soejima et al., 2006; Soejima and Koda, 2007; Izagirre et  
23 al., 2006; Voight et al., 2006; Lao et al., 2007).  
24  
25 Strong positive selection acting on skin pigmentation has resulted in large effect sizes that  
26 explain a large fraction of heritable variation. For example, a previous study showed that only 4

1 loci explain 35% of the variation in skin pigmentation in recently admixed Cape Verdeans, who  
2 have European and West African ancestors (Beleza et al., 2013b). In contrast, complex traits  
3 such as height and schizophrenia, typically require ~10,000 independent SNPs derived from  
4 GWAS of >100,000 individuals to build predictors that respectively explain ~29% and ~20% of  
5 the variance in independent cohorts (Wood et al., 2014; Schizophrenia Working Group of the  
6 Psychiatric Genomics Consortium, 2014). As a consequence of strong positive selection,  
7 previous studies of naturally selected traits such as pigmentation, high altitude adaptation, and  
8 response to pathogens have repeatedly shown that these traits have typically evolved  
9 substantially larger effect sizes than, for example, complex common disease; these large effect  
10 loci have typically been discovered with small sample sizes (i.e. ~100s of individuals) relative to  
11 GWAS of complex, highly polygenic traits (Kenny et al., 2012; Yi et al., 2010; Zhou et al., 2013;  
12 Alkorta-Aranburu et al., 2012; Genovese et al., 2010; Kayser et al., 2008; Moltke and  
13 Albrechtsen, 2013). While adaptive pigmentation loci are among the most diverged in the  
14 genome across populations, it is worth noting that effect size estimates for nearly all significant  
15 GWAS associations that are polymorphic across well-studied populations are on average  
16 directionally consistent at individual loci across populations (Liu et al., 2015; Carlson et al.,  
17 2013), but that, in aggregate, prediction accuracy varies across populations (Martin et al.,  
18 2017).

19  
20 Populations at lower latitudes—closer to the equator—typically have darker skin color than  
21 those in Europe or East Asia. Recently admixed populations (i.e. groups with highly divergent  
22 ancestors) have increased pigmentation variation, and the largest genetic effects are due to  
23 derived alleles that reduce melanin (Marcheco-Teruel et al., 2014; Beleza et al., 2013b; Norton  
24 et al., 2006; Norton et al., 2007). For example, all four significantly associated pigmentation loci  
25 identified in the study of Cape Verdeans were derived in Europeans, which together with  
26 admixture proportions explain the majority of heritable variation (Beleza et al., 2013b).

1 Together, these studies highlight a complex interaction between latitude, the strength of  
2 selection (i.e. likelihood of selective sweep), and the distribution of effect sizes (i.e.  
3 polygenicity). A clear understanding of the genetic determinants of dark skin variability is  
4 lacking.

5

6 Striking skin pigmentation variability among African populations has been underappreciated in  
7 genetic studies (Relethford, 2000; Jablonski and Chaplin, 2014). Additionally, genetic diversity  
8 declines with distance from Africa (Ramachandran et al., 2005), which, coupled with greater  
9 phenotypic variation, suggests that more genetic variation may contribute to skin pigmentation  
10 diversity in Africa. Light skin pigmentation is observed in the far southern latitudes of Africa  
11 among KhoeSan hunter-gatherers and pastoralists of the Kalahari Desert and nearby regions.  
12 The KhoeSan are unique in their early divergence from other populations, likely dating back at  
13 least ~100,000 years ago (Gronau et al., 2011; Schlebusch et al., 2012; Veeramah et al.,  
14 2012); they exhibit extraordinary levels of genetic diversity and low levels of linkage  
15 disequilibrium (LD) (Henn et al., 2011; Li et al., 2008; Ramachandran et al., 2005). Previous  
16 work points to southern Africa as the point of origin for modern humans (Henn et al., 2011;  
17 Luca et al., 2011; Tishkoff et al., 2009), but it is unknown whether moderate to light skin  
18 pigmentation in the different KhoeSan groups is an example of convergent evolution with  
19 northern Europeans and Asians, or reflects the ancestral human phenotype. Previous studies  
20 using samples from the Human Genome Diversity Panel (HGDP) have noted different  
21 pigmentation allele frequencies between the Ju|'hoansi KhoeSan and other Africans, but these  
22 have been based on  $n < 7$  individuals from the former population without associated phenotype  
23 data (Berg and Coop, 2014; Norton et al., 2007).

24 Here we report an evolutionary and genetic study of skin pigmentation with a total of 465  
25 genotyped KhoeSan individuals (278  $\ddagger$  Khomani San and 187 Nama), with targeted

1 resequencing at associated pigmentation loci in 439 KhoeSan individuals (268 ‡Khomani, 171  
2 Nama) and matched quantitative spectrophotometric phenotype data (**Table S4**). The ‡Khomani  
3 San are traditionally a N|u-speaking hunter-gatherer population living in the southern Kalahari  
4 Desert, while the Nama are traditionally a Khoekhoe-speaking semi-nomadic pastoralist group  
5 of KhoeSan ancestry. We investigate: i) the degree of polygenicity and heritability of skin  
6 pigmentation, ii) the extent to which variation in pigmentation is explained by previously  
7 associated or canonical pigmentation genes, and iii) novel pigmentation alleles contributing to  
8 variation in the ‡Khomani San and Nama populations.

## 9 **Results**

10  
11 Baseline skin color was quantitatively phenotyped for 479 individuals (277 ‡Khomani, 202  
12 Nama, **Table S4**) via specialized narrow-band reflectometry that specifically measures  
13 hemoglobin and melanin of both the left and right upper inner arms (Methods, (Diffey et al.,  
14 1984)), with M index =  $\log_{10}(1 / \% \text{ red reflectance})$ . Sequencing and/or genotyping was  
15 performed for a subset of phenotyped samples (**Table S4**, Methods). Skin pigmentation is  
16 considerably lighter in the KhoeSan than the majority of other African populations, with baseline  
17 upper arm M index =  $57.57 \pm 10.12$  (mean  $\pm$  sd, N = 278) in the ‡Khomani San. Baseline upper  
18 arm pigmentation in the Nama is slightly lower, with M index =  $52.12 \pm 8.93$  (N=223). The  
19 ‡Khomani are on average significantly darker than the Nama ( $p=3.6e-10$ , **Figure 1C**), but the  
20 variance is not significantly different ( $p>0.05$ ). For comparison, we aggregated quantitative skin  
21 pigmentation across 32 globally diverse populations (4,712 individuals) assayed with a  
22 DermaSpectrometer (DSMI or DSMII—the latter was used in this study) (Basu Mallick et al.,  
23 2013; Beleza et al., 2013b; Candille et al., 2012; Durazo-Arvizu et al., 2014; Edwards et al.,  
24 2010; Norton et al., 2006; Coussens et al., 2015) (**Figure 1A-B**, **Table S1**). Only four African  
25 populations are available for comparison; among these only the Ghanians represent an

1 equatorial African population without recent admixture. Skin color is substantially darker in  
2 equatorial Ghanaians, where M index reaches a mean of  $96.04 \pm 10.94$ ; M index for Cape  
3 Verdeans, who have ~40% European admixture on average, have slightly lighter ( $55.39 \pm$   
4  $13.00$ ,  $p=5.6e-3$ ) and considerably more variable pigmentation ( $p=1.9e-6$ ) than the KhoeSan.  
5 Two other populations living in South Africa, the Xhosa and admixed Coloured populations,  
6 have respectively darker (M index= $67.1 \pm 7.5$ ) and similar (M index= $53.1 \pm 8.5$ ) pigmentation  
7 compared to the KhoeSan populations (Coussens et al., 2015).

8

### 9 *Evidence of Increased Polygenicity in Skin Pigmentation Among Equatorial Populations*

10

11 We tested whether the correlation between absolute latitude and pigmentation was significant  
12 with our large, quantitatively phenotyped sample of global populations. As previously observed  
13 (Jablonski and Chaplin, 2010; Byard, 1981; Zaidi et al., 2017), we find that skin pigmentation is  
14 strongly associated with absolute latitude ( $R^2=0.53$ ,  $\beta=-1.18$  on M index scale,  $p<2e-16$ );  
15 populations further from the equator have lighter skin pigmentation. We next tested whether  
16 variance in melanin within populations also varies across populations. Skin pigmentation has  
17 primarily been studied in lightly pigmented European and East Asian populations, where skin  
18 color varies minimally among individuals (**Figure 1A-B**). Less-studied equatorial and admixed  
19 populations, including Melanesians, Ghanaians, Cape Verdeans, South African admixed  
20 Coloured, and South Asians vary considerably more in skin pigmentation (**Figure 1B**). We find  
21 that absolute latitude is also significantly negatively associated with the standard deviation in  
22 melanin ( $R^2=0.41$ ,  $p=5.0e-5$ ). Further, melanin distributions are heteroskedastic (i.e. the  
23 variance is not constant—rather, it changes over the range of observed M index), with the  
24 coefficient of variation, a standardized metric of phenotypic dispersion, decreasing with  
25 increasing distance from the equator ( $cv=\sigma/\mu$ ,  $R^2=0.14$ ,  $p=0.03$ , **Table S1**).

26



1 A sign test comparing variances in lighter versus darker population pairs within the same study  
2 indicates that populations with lighter skin have significantly reduced phenotypic variance than  
3 expected by chance ( $p=2.01e-8$ ). These results suggest that there is reduced genetic  
4 heterogeneity and/or reduced variance in the population distribution of causal effect sizes  
5 contributing to lighter versus darker pigmentation. There is more than an order of magnitude  
6 difference in variance between the lightest and darkest populations (i.e. Irish vs Ghanaian  
7  $F=0.03$ ,  $p=6.7e-23$ ). Europeans and East Asians have significantly less variation than South  
8 Asians ( $F=0.25$ ,  $p=1.06e-14$  and  $F=0.30$ ,  $p=1.27e-10$ , respectively, **Figure 1B**). Cape Verdeans  
9 with the highest quartile of European admixture have lighter, less variable skin color than  
10 individuals with the lowest quartile of European ancestry ( $p=4.28e-9$ , although notably ancestry  
11 proportions are bimodal across individuals). Among Melanesians, islands at similar latitudes  
12 with more lightly pigmented individuals on average show less variance than those with more  
13 darkly pigmented individuals (e.g. one-sided F test comparing variance among more lightly  
14 pigmented New Britain individuals versus individuals from Bougainville,  $p=2.89e-9$ , **Figure 1B**).  
15 Among the  $\ddagger$ Khomani and Nama, comparing individuals with primarily European admixture  
16 ( $>20\%$ ,  $N=124$ ) to individuals with primarily Bantu admixture ( $>20\%$ ,  $N=91$ ), we find significantly  
17 greater melanin variation among KhoeSan individuals with more Bantu admixture ( $p=1.33e-4$ ).

18

### 19 *Ancestry and Skin Pigmentation Variation in the KhoeSan*

20

21 The  $\ddagger$ Khomani San and the Nama have both experienced admixture with neighboring darker-  
22 skinned Bantu-speaking groups beginning  $\sim 450$  years ago, as well as with lighter-skinned  
23 European settlers who first arrived in the Northern Cape during the late 18<sup>th</sup> century (Uren et  
24 al., 2016). We assessed these ancestry proportions using unsupervised allele frequency  
25 clustering with ADMIXTURE as well as principal components analysis (PCA, Methods). At  $k=3$ ,  
26 we observe distinct clustering between Europeans, Bantu-speaking and West African

1 populations, and KhoeSan populations; both the Nama and the ǀKhomani have ~75-80%  
2 KhoeSan-specific ancestry. For  $k=7$ , which gives most stable ancestry estimates, we observe a  
3 partitioning of the KhoeSan ancestry into ‘northern Kalahari’ ancestry shared with Jul’hoansi  
4 and a distinct southern or circum-Kalahari ancestry present in the Nama and the ǀKhomani. On  
5 average, in the ǀKhomani San we find 55% northern Kalahari KhoeSan ancestry, 21% southern  
6 Kalahari KhoeSan ancestry, 11% European ancestry (common in CEU and French individuals),  
7 12% western African ancestry (common in Yoruba and Bantu-speaking populations), and 2%  
8 attributable to other African populations (Tanzanian hunter-gatherers, East African, and North  
9 African populations, **Table S2, Figure 2A and Figure S2A**). The Nama differ from the  
10 ǀKhomani in their proportion of northern versus southern Kalahari ancestry; they have 17%  
11 northern Kalahari ancestry, 62% southern Kalahari ancestry, 9% European ancestry, 10%  
12 western African ancestry, and 1% attributable to other African populations on average. The  
13 western African fraction in the Nama is significantly more variable among individuals ( $p=1.08e-$   
14  $5$ ), resulting from recent Damara gene flow (Uren et al., 2016). The partition of ancestry  
15 components occurs in the same order and is correlated between ADMIXTURE and PCA  
16 (**Figure 2, Figure S2A,D-F**).

17  
18 We performed forward stepwise regression to select the best multivariate mixed model of  
19 ancestry and pigmentation with a random effect accounting for the genetic relationships among  
20 individuals. Sex and age do not significantly correlate with baseline skin pigmentation,  
21 suggesting that our quantitative measure of underarm reflectance is not significantly affected by  
22 UV exposure. The best model fit, measured via AIC, included Bantu, European, East African,  
23 and Hadza ancestries, although the latter two components comprise  $\leq 1\%$  of individuals’ total  
24 ancestry on average and are likely imprecisely measured. In the multivariate mixed model with  
25 European and Bantu admixture components, European ancestry is strongly correlated with

1 lightened skin ( $\beta = -18.09$ ,  $p=2.9e-03$ ), and Bantu ancestry is correlated with darkened skin ( $\beta =$   
2  $25.60$ ,  $p=1.8e-09$ ). Together, we estimate that fixed admixture effects explained 34% of the  
3 variation in skin color (adjusted  $R^2$ ); by comparison, 44% of pigmentation variation in Cape  
4 Verdeans is explained by admixture effects (Beleza et al., 2013b). Marginal associations are  
5 shown in **Figure 2B**, with pairwise ancestry correlations shown in **Figure S2B**. Southern  
6 Kalahari ancestry, frequent in the Nama, is significantly anti-correlated with Bantu ancestry and  
7 is marginally predicted to lighten skin, but not when modeled jointly with Bantu ancestry in a  
8 multivariate model. Interestingly, the mean pigmentation of Nama and  $\ddagger$ Khomani individuals  
9 with <90% KhoeSan ancestry is *not* significantly different from individuals with >90% KhoeSan  
10 ancestry ( $p=0.94$ ), although the variance is significantly greater in more admixed individuals  
11 (admixture from either/both European or Bantu ancestries,  $p=2.2e-3$ ). These results suggest  
12 that while admixture increases phenotypic variance, pigmentation alleles on KhoeSan  
13 haplotypes contribute more to the overall heterogeneity than those on European or Bantu  
14 haplotypes. Consistent with this result, we observe substantial skin pigmentation variation  
15 among related individuals, which, coupled with high heritability (see below) suggests a role for  
16 large effect sizes of alleles contributing to pigmentation.

17

### 18 *Skin Pigmentation is Highly Heritable*

19

20 We inferred narrow sense heritability for baseline skin pigmentation and tanning status in the  
21 KhoeSan with four methods: family pedigrees ( $h^2_{pedigree}$ ), SNP array similarity matrices ( $h^2_g$ ),  
22 identity-by-descent (IBD) sharing matrices ( $h^2_{IBD}$ ), and exome sequence variation ( $h^2_{exome}$ , **Table**  
23 **1**). While pedigree-based heritability estimates are not based on genetic data and therefore not  
24 strongly affected by admixture, its careful consideration is necessary for SNP-based estimates,  
25 as described previously (Beleza et al., 2013b; Zaitlen et al., 2013; Zaitlen et al., 2014; Thornton

1 et al., 2012) and as we have conducted here. In each of the heritability estimates of baseline  
2 skin color, we accounted for admixture proportions with European and Bantu ancestry as  
3 covariates, as well as familial relatedness via a kinship covariance matrix. Similarly for tanning  
4 status, we accounted for age, sex, and kinship. Previous family-based estimates for skin color  
5 heritability in other populations are high, ranging between 55-90% (Byard, 1981; Clark et al.,  
6 1981; Frisancho et al., 1981; Harrison and Owen, 1964; Paik et al., 2012). Interestingly,  
7 published genetic estimates of skin pigmentation heritability in Europe are low and insignificant,  
8 potentially because of reduced genetic diversity at skin pigmentation loci due to positive  
9 selection (Zaidi et al., 2017). Our heritability estimates in the KhoeSan are analogous to family-  
10 based estimates because of the elevated relatedness in our samples.

11 We first constructed pedigrees from ethnographic interviews for individuals within the †Khomani  
12 and Nama populations and verified relationships where possible with genetic data. 533  
13 individuals (including parental individuals not sampled) could be assigned to a pedigree,  
14 resulting in 354 extended pedigrees and 470 nuclear families. Via traditional pedigree-based  
15 estimation of narrow sense heritability using the Sequential Oligogenic Linkage Analysis  
16 Routines (SOLAR) software (Almasy and Blangero, 1998), we estimate an  $h^2_{pedigree}$  of  $0.96 \pm$   
17  $0.12$  for baseline skin color. We then asked whether variation present on the ascertained SNP  
18 arrays or from exome sequencing could explain a similar fraction of the pigmentation variation.  
19 Genetic heritability estimates inferred from recently admixed populations have two potential  
20 problems: 1) inferred familial relationships between individuals are less accurate (Thornton et  
21 al., 2012), and 2) environmental confounders (e.g. socioeconomic status) could be associated  
22 with the variance component attributed to additive genetic effects. In order to address the first  
23 issue, we use the proportion of KhoeSan, European and Bantu ancestry per individual to correct  
24 the SNP array genetic relatedness matrix (GRM) as described by the REAP approach  
25 (Thornton et al., 2012). The REAP matrix is also compared to the IBS matrix inferred using

1 default GCTA parameters that do not account for stratification (*Methods*). We include European  
2 and Bantu ancestry as global covariates in the heritability estimation. All further estimation of  $h_g^2$   
3 was made using the unconstrained model in GCTA. Furthermore, we contrast baseline  
4 pigmentation with tanning status (i.e. sun exposed wrist – underarm melanin pigmentation); if  
5 our estimates were inflated by environmental confounders, we would also expect inflated  
6 heritability of tanning status.

7 The array-based heritability point estimates are consistently but not significantly higher when  
8 using a kinship matrix from Relatedness Estimation in Admixed Populations (REAP) than  
9 GCTA's identity-by-state (IBS) GRM, both for the joint dataset and each population separately  
10 (**Table 1** and **Table S3**). We estimate  $h_g^2 = 0.97 \pm 0.15$  (standard error) in an unconstrained  
11 model across both populations using the REAP GRM. We find consistent results from exome  
12 sequence data, where we estimate that  $h_{exome}^2 = 0.95 \pm 0.26$  in the ‡Khomani. We then used the  
13 familial relationships (**Figure S1**) and population-level endogamy to estimate heritability from  
14 IBD sharing among all individuals in the ‡Khomani and Nama; we obtain a similar estimate of  
15  $h_{IBD}^2 = 0.97 \pm 0.15$  (*Methods*, see also (Zaitlen et al., 2013)).

16 We contrast the high heritability estimates for baseline pigmentation with estimates for tanning  
17 status. Tanning status is significantly associated with both sex (male  $\beta=6.2$  increase in M index,  
18  $p = 4.2e-4$ ) and age ( $\beta=0.18$  increase in M index per year,  $p=1.8e-4$ ), but not with admixture  
19 proportions. None of the tanning status  $h^2$  estimates, including pedigree-, IBD-, exome-, and  
20 SNP array-based estimates, are significantly greater than 0 (**Table 1**), consistent with previous  
21 observations that tanning status is largely environmentally determined by UV exposure (Clark et  
22 al., 1981; Nan et al., 2009). Previous GWAS of tanning status have also failed to identify and  
23 replicate significant SNPs that are not already known to canonically influence baseline  
24 pigmentation (Nan et al., 2009). The stark contrast of the baseline pigmentation and tanning

1 status heritability estimates, and the consistency of  $h^2$  across methods indicates that our high  
2 baseline pigmentation heritability estimates do not simply arise from pedigree and population  
3 structure and that socioeconomic factors are unlikely to have significant effect on our heritability  
4 estimates.

5

## 6 *A Complex Genetic Architecture in the KhoeSan*

7

8 The genetic architecture of skin pigmentation has been described as simpler than many other  
9 phenotypes, for which only a few genes explain ~35% of the total variation in a given  
10 population, and average genomic ancestry explains an additional ~44% of the variation,  
11 indicating a long tail of smaller effects (Beleza et al., 2013b; Candille et al., 2012). We  
12 investigated how much of the heritable variation in KhoeSan populations can be ascribed to  
13 previously annotated pigmentation gene sets (**Figure 3A**). The first gene set (GS1) consists of  
14 14 genes containing or near previously discovered skin pigmentation genetic associations in  
15 Europeans, East Asians, Cape Verdeans, and Native Americans (**Table 2** and **Table S6**). The  
16 larger, second gene set (GS2) contains 50 genes compiled previously (Beleza et al., 2013b)  
17 from human pigmentation associations, positive selection scans, and model organism  
18 pigmentation loci. The third gene set (GS3) contained 50 loci most significantly associated with  
19 pigmentation in the KhoeSan (phase 1, see section titled “*Novel Variants Influence Skin*  
20 *Pigmentation in KhoeSan Populations*”). We partitioned the genome into GS1, GS2, GS3, and  
21 the rest of the genome and performed four comparisons, computing the variance explained by:  
22 GS1 versus the rest of the genome, GS2 versus the rest of the genome, GS3 versus the rest of  
23 the genome, and GS1 versus GS2 versus the rest of the genome. For each comparison, we  
24 performed a restricted likelihood ratio test. The GS1 and GS2 gene sets do not explain a  
25 significant fraction of the heritability; that is, the heritability estimates overlap with zero. Rather,  
26 the remainder of the genome explains the overwhelming majority of the heritability (**Figure 3B**,

1  $\sigma^2_{GS1}=0.08$  vs  $\sigma^2_{Genome}=0.82$ ,  $p_{Genome}=2.7e-5$ ;  $\sigma^2_{GS2}=0.09$  vs  $\sigma^2_{Genome}=0.79$ ,  $p_{Genome}=3.3e-4$ ; and  
2  $\sigma^2_{GS1}=0.08$  vs  $\sigma^2_{GS2}=0.09$  vs  $\sigma^2_{Genome}=0.71$ ,  $p_{Genome}=2.5e-3$ , respectively). This result contrasts  
3 with conclusions from previous studies and indicates that the vast majority of variation in  
4 KhoeSan skin pigmentation arises from pigmentation genes yet to be discovered, providing  
5 strong evidence for a complex, polygenic architecture. GS3 explains a small but significant  
6 fraction of the heritability, as discussed below.

7  
8 We further assessed whether GS1 and GS2 explain more of the heritable variation than a  
9 random sample of coding regions; genes tend to explain more phenotypic variation than  
10 noncoding regions (Gusev et al., 2014). Specifically, we matched both candidate gene sets by  
11 number of genes, length, and number of exons and permuted these matched samples 1000  
12 times. After regressing out the effect of variable numbers of SNPs per gene set, we find that  
13 both GS1 and GS2 explain more than random genes with a 10% false discovery rate  
14 (FDR=0.016 and FDR = 0.079, **Figure 3C-D**, respectively) across both KhoeSan populations.  
15 This is not significant in the Nama alone (**Figure S3**), likely because of ancestry heterogeneity  
16 between the two populations.

17

### 18 *Replication of Known Pigmentation Associations in the KhoeSan*

19

20 Even though previously identified pigmentation loci explain little of the phenotypic variance in  
21 our samples, it is possible that these loci simply have small effect sizes in the KhoeSan. We  
22 used SNP array and/or resequencing data in a linear mixed model with ancestry covariates (see  
23 Methods and “*Novel Variants Influence Skin Pigmentation in KhoeSan Populations*”) to assess  
24 both the frequencies and effect sizes of 42 previously identified eye, skin, and hair pigmentation  
25 variants, some of which have been experimentally shown to be causal (**Table 2** and **Table S6**).  
26 To this end, we also deconvolved recent admixture into local ancestry tracts across the genome

1 and estimated the allele frequencies specifically on KhoeSan haplotypes via expectation-  
2 maximization (Gravel et al., 2013). Known pigmentation allele frequencies vary considerably  
3 between the ‡Khomani San, Europeans, and West Africans (**Table 2**).

4

5 Most previously identified pigmentation associations do not replicate with genome-wide  
6 significance or nominally in the ‡Khomani and Nama, with a few exceptions. Four SNPs in the  
7 genes *SLC45A2* (rs16891982,  $p=1.2e-3$ ), *KITLG* (rs12821256,  $p=0.02$ ), and *SLC24A5*  
8 (rs1426654,  $p=9.8e-9$  and rs2470102,  $p=1.1e-8$ ) marginally replicate in the ‡Khomani + Nama  
9 under an additive model. The derived allele frequencies of the associated SNPs in *SLC45A2*  
10 and *KITLG* are low in the KhoeSan, consistent with ~10% admixture from recent European  
11 gene flow. Interestingly, however, SNPs in *OCA2*, *SLC24A5* and *GRM5/TYR* are at much  
12 higher frequencies in both the ‡Khomani and Nama than expected from European admixture  
13 alone, as estimated from global ancestry (**Methods**). We do not replicate the vast majority of  
14 previously observed skin pigmentation associations in our dataset, potentially due to low  
15 frequencies in the KhoeSan, power limitations, differentiated LD structure in which the tag SNPs  
16 are non-causal pigmentation alleles, or epistatic effects. It is therefore unsurprising that when  
17 we applied forensic models based on only seven SNPs that claim very high prediction accuracy  
18 of skin color across populations (>99%) (Spichenok et al., 2011; Hart et al., 2013), we did not  
19 find a significant association with quantitatively measured M index ( $p=0.31$ , **Figure S5B**).

20

21 Because high divergence in a segment of the genome can be a signature of selection (e.g. XP-  
22 EHH scans), we assessed genetic divergence between KhoeSan, West African, and European  
23 populations at SNPs and in sliding windows across the genome. We find considerable  
24 divergence in many canonical pigmentation genes when comparing regions of the genome  
25 across populations (**Figure 4A-B**). We followed up our divergence scan by focusing on two  
26 outlier genes that were highly diverged among all three populations: *SLC24A5* and *OCA2*



1 **(Figure 4)**. The divergence in *SLC24A5* is among the highest in the genome, especially  
2 between the KhoeSan and European populations **(Figure 4D)**. Interestingly, different regions of  
3 *OCA2* exhibit elevated divergence between the KhoeSan and European comparison versus the  
4 KhoeSan and West African comparison **(Figure 4C)**. A previous study suggested that the  
5 derived, synonymous T allele of rs1800404 in *OCA2* has been positively selected and is a  
6 candidate skin pigmentation variant conferring light skin in Europeans and KhoeSan populations  
7 based on its global allele frequency distribution (Norton et al., 2007). We confirm its elevated  
8 allele frequency on KhoeSan haplotypes (65%), but do not find an association with skin  
9 pigmentation ( $p=0.53$ ). Variants in *OCA2* explain most of the variation in human eye color  
10 (Duffy et al., 2007), and rs1800404 was later significantly associated with this phenotype  
11 (Eriksson et al., 2010); ‡Khomani and Nama individuals notably have heterogeneous eye color,  
12 with a range of brown, hazel, and green eyes. We identified a missense mutation in *OCA2*  
13 (rs1800417, ns with skin pigmentation:  $p=0.87$ ) with a derived allele (G) frequency of 0.32 in the  
14 KhoeSan **(Table S6)** that is at low frequency in all other populations surveyed (global allele  
15 frequency = 0.016 in Phase 3 1000 Genomes and 0.0058 in the Exome Aggregation  
16 Consortium, ExAC).

17

### 18 *Novel Variants Influence Skin Pigmentation in KhoeSan Populations*

19

20 To identify novel variants associated with skin pigmentation in the ‡Khomani and Nama, we  
21 performed a 2-stage study **(Figure S6A)**, employing a linear mixed model approach including  
22 recent admixture covariates as fixed effects and covariance matrices adjusted for admixture  
23 (akin to a GRM in GCTA) as random effects to identify associations between pigmentation and  
24 high quality imputed variants (Alexander et al., 2009). We assessed the quality of the  
25 imputation via homozygous reference, heterozygous, and homozygous non-reference  
26 concordance with high coverage exome sequencing data **(Figure S4A)**. We ran the initial

1 GWAS (i.e. phase 1) with imputed variants from 107  $\pm$  Khomani and 109 Nama individuals  
2 (**Table S4, Table S5, Figure S6A-C**), and the genes closest to the strongest associations  
3 (**Table S5**) showed a significant enrichment in multiple mammalian phenotypes related to skin  
4 pigmentation (abnormal extracutaneous pigmentation  $p=2.3e-3$ , abnormal melanocyte  
5 morphology  $p=5.8e-3$ , abnormal skin morphology  $p=3.5e-2$ ). Further, the strongest signals  
6 across the genotyped  $\pm$  Khomani and Nama cohorts were near canonical pigmentation genes  
7 (e.g. *TYRP1* and *SLC24A5*) (Sturm, 2009), genes associated with pigmentation-related  
8 disorders (e.g. *TYRP1*) (Jin et al., 2010), or genes implicated in pigmentation in model  
9 organisms and *in vitro* studies (e.g. *VLDLR*, *SMARCA2*, and others) (Demir et al., 2013;  
10 Keenen et al., 2010; de la Serna et al., 2006; Liu-Smith et al., 2014). To assess the variation  
11 explained by the most significantly associated loci, we generated an additional gene set,  
12 referred to as “GS3”, using the 50 most significantly associated loci  $\pm$  10 kb. We find that the  
13 GS3 loci explain significantly more of the heritable variation in skin pigmentation than previously  
14 identified pigmentation candidate genes in the KhoeSan, but that the majority of heritable  
15 variation remains to be explained (**Figure 3B**,  $\sigma^2_{GS3}=0.23\pm 0.13$ ,  $p_{GS3}=0.027$  vs  
16  $\sigma^2_{Genome}=0.64\pm 0.08$ ,  $p_{Genome}<1e-5$ ).

17  
18 Based on initial evidence from the imputed  $\pm$  Khomani pigmentation GWAS, we designed a  
19 targeted NGS capture and successfully resequenced 36 candidate pigmentation regions (**Table**  
20 **S7, Figure S6**) across a larger set of 451 KhoeSan samples in order to improve power to detect  
21 associated loci (**Table S8**, Supplementary Materials), including 269 Khomani, and 182 Nama  
22 individuals. In this larger sample, we observe more variants significantly associated with  
23 pigmentation than expected by chance in the resequencing regions (**Figure 5A**). The strongest  
24 signal comes from SNPs in *SLC24A5*, 8 of which are all in high pairwise LD ( $R^2 > 0.6$ ) on a high  
25 frequency haplotype (**Figure 5B**). We identify significant associations between lighter skin and  
26 derived *SLC24A5* SNPs, including the putatively causal p.Thr111Ala rs1426654 allele ( $\beta=-3.58$

1 on M index scale,  $p=9.8e-9$ ), which has previously been associated with skin pigmentation in  
2 Eurasians. The most strongly associated SNP (rs2555364,  $\beta=-3.58$  on M index scale,  $p=6.7e-9$ )  
3 is tightly linked with rs1426654 (LD  $R^2=0.81$ ). These variants are strongly differentiated between  
4 Europeans and Africans, with rs1426654 having derived allele frequencies of 99.7% vs 5.5% in  
5 1000 Genomes (excluding ASW and ACB populations with recent European admixture),  
6 respectively. The derived allele of rs1426654 has previously been observed in HGDP Ju|'hoansi  
7 San samples at 7% frequency, which have no detectable recent European admixture (Norton et  
8 al., 2007). The frequency of the derived rs1426654 allele is 40% in the combined Nama +  
9 ‡Khomani dataset, which is significantly greater than expected from ~11% European admixture  
10 alone (binomial test  $p=7.8e-52$ , **Table S6, STAR Methods**).

11  
12 Multiple low frequency (<5%) SNPs near several additional genes, including *EPM2A*, *FREM1*,  
13 *SMARCA2/VLDLR*, and *TYRP1*, are above the 95% confidence interval of expected versus  
14 observed significance (**Figure 5**). Two of these regions are near *EPM2A* and *FREM1*, which are  
15 known to play roles in myoclonic epilepsy and the development of multiple organ systems,  
16 respectively; however, neither of these genes play any known role in skin pigmentation either in  
17 humans or model organisms. In contrast, there are >5 independent low frequency signals  
18 upstream, downstream, and in introns of *SMARCA2* and near *VLDLR* with  $p<1e-3$ , with  
19 rs7866411 ( $p=8.91e-5$ ) and rs2093835 ( $p=1.17e-4$ ) being the SNPS most significantly  
20 associated with skin pigmentation. We used HaploReg to infer regulatory activity in/near these  
21 peaks and identify multiple enhancer and DNase peaks identified in skin, including melanocytes  
22 and/or keratinocytes, overlapping top tag and/or perfectly linked SNPs (**Table S9**). We also  
23 identify a low frequency association (rs34803545,  $p=3.7e-4$ ) ~600 kb upstream of *TYRP1* in a  
24 gene desert. This variant is perfectly linked with multiple conserved variants, one of which  
25 exhibits enhancer activity and DNase hypersensitivity specifically in skin (**Table S9**).

26

1 We followed our phase 1 GWAS analysis with a 2<sup>nd</sup> phase, in which an additional 240 unique  
2 individuals were genotyped (**Table S4, Figure S6A**) and meta-analyzed with phase 1 summary  
3 statistics. While two tanning status associations met genome-wide significance, none of the loci  
4 contained linkage peaks, suggesting that they are most likely spurious. The tanning status  
5 GWAS results are expected from a phenotype with low heritability. As expected from the  
6 resequencing study, we identified a genome-wide significant association in *SLC24A5*  
7 (rs2470102 derived allele  $\beta = -3.4$ ,  $p=3.6e-12$ ) and a suggestive association upstream of *TYRP1*  
8 (chr9:12088112, frequency=0.014,  $\beta = -13.6$ ,  $p=1.1e-07$  **Figure S6B-C, Figure S6F-G**). We  
9 identified an additional suggestive novel association in and near *SNX13*, with common derived  
10 T alleles of rs2110015 associated with light skin ( $\beta = -3.1$ ,  $p=1.3e-07$ , **Figure S6H**); *SNX13*  
11 regulates lysosomal degradation and G-protein signaling, but has not previously been  
12 associated with skin pigmentation.

13

14

## 15 **Discussion**

16

17 Pigmentation has been described previously as a relatively simple trait with few loci of large  
18 effect contributing to the phenotype (Hart et al., 2013; Spichenok et al., 2011; Sulem et al.,  
19 2007). However, populations living in continental Africa, where humans have the greatest  
20 genetic diversity and variation in pigmentation (as demonstrated here), have been largely  
21 ignored in genetic studies of quantitatively phenotyped pigmentation. We investigated the  
22 genetic architecture of pigmentation in two KhoeSan populations: the Khomani San and Nama,  
23 where baseline melanin variation is substantial. The southern African KhoeSan populations are  
24 the most polymorphic modern human populations yet studied (Henn et al., 2011), and provide a  
25 unique glimpse into the evolution of pigmentation.

26

## 1 *Novel Genetic Associations with Pigmentation*

2

3 We have performed the first genetic discovery effort for pigmentation loci in the Nama and  
4 ‡Khomani San populations. The strongest allelic associations include previously associated  
5 variants, noncoding regions near canonical pigmentation genes, and novel genes shown in  
6 model organisms to have a role in pigmentation. The strongest association is in *SLC24A5*,  
7 which is a well-known pigmentation gene (Lamason et al., 2005) and is among the most  
8 differentiated regions of the genome between European and African populations – indicative of  
9 strong positive selection in northern Europeans (Sturm and Duffy, 2012). We find that derived  
10 variants in *SLC24A5* are at high frequency in the KhoeSan, including missense mutations that  
11 influence skin and eye pigmentation (Table 2). Notably, these variants are segregating at higher  
12 frequency than expected by recent European admixture alone. Three possible evolutionary  
13 scenarios that may explain these elevated frequencies are: 1) these variants arose in southern  
14 Africa more than 100,000 years ago and were later selected for in Europeans after the out-of-  
15 Africa migration in response to northern UVR environments. Alternatively, 2) these variants  
16 arose in Europe/Near East, were introduced into KhoeSan populations via “back to Africa”  
17 migration into southern Africa predating 17<sup>th</sup> century European colonialism (Tishkoff et al., 2007;  
18 Pickrell et al., 2012; Pickrell et al., 2014; Uren et al., 2016), and have since been positively  
19 selected in the KhoeSan. Lastly, 3) a recurrent mutation (G to A transition at the CpG ancestral  
20 dinucleotide, a class of mutations shown to have elevated mutation rates) occurred.  
21 Considerable future work is needed to definitively disentangle these scenarios.

22

23 We find a significant enrichment of genes related to melanogenesis in our GWAS. Specifically,  
24 we find several independent associations near *SMARCA2* and *VLDLR*. *SMARCA2* has a known  
25 role in folate biosynthesis, in vitamin D-coupled transcription regulation, and is differentially  
26 expressed across CEU and YRI populations in lymphoblastoid cell lines (Duan et al., 2009).

1 Additionally, previous functional studies have shown that *MITF*, the transcription factor known  
2 as the “master regulator of melanogenesis” due to its ability to activate many melanocyte-  
3 specific genes (Praetorius et al., 2013), recruits critical components of the SWI/SNF chromatin  
4 remodeling complex, including *SMARCA2*, to the promoter region of its targets (Vachtenheim et  
5 al., 2010). This recruitment is required for normal expression of many *MITF* target genes,  
6 including *TYR*, *TYRP1*, *DCT*, *RAB27A*, *BCL2*, among others (Keenen et al., 2010; de la Serna  
7 et al., 2006). Additionally, *VLDLR* knockout mice exhibit hypopigmented retinas (Xia et al.,  
8 2013). We also find a suggestive association upstream of *TYRP1* (**Figure 5A**). *TYRP1*  
9 mutations in humans have been associated with oculocutaneous albinism and shown to cause  
10 nearly Mendelian inheritance of blond hair in Solomon Islanders (Kenny et al., 2012;  
11 Sarangarajan and Boissy, 2001). Thus, we observe enrichments of molecular pathways  
12 involved in pigmentation beyond those previously identified as associated with the phenotype in  
13 non-African populations.

14

### 15 *The Polygenic Architecture of Pigmentation in Africa*

16

17 We assessed the heritability of baseline skin pigmentation, and find that it is virtually completely  
18 heritable in our KhoeSan sample. In contrast, tanning status is primarily environmental, with  
19 heritability estimates which are not significantly different from zero. In European populations,  
20 predictive models based on only 9 SNPs capture up to 16% of the variance in skin pigmentation  
21 (Liu et al., 2015), highlighting its relative simplicity. We applied a predictive model (Spichenok et  
22 al., 2011; Hart et al., 2013) based on these SNPs to the Nama and †Khomani San populations,  
23 and find no significant association between predicted skin color and spectrophotometrically  
24 measured skin M index, showing that this estimation fails to capture the genetic variation driving  
25 the phenotype in the KhoeSan. Given the large effect sizes and high fraction of variation  
26 explained in Eurasian populations, we asked whether and how much of the phenotypic variation

1 can be explained by previously identified genes. All gene sets, including previously associated  
2 loci, canonical pigmentation genes, and the most significantly associated variants in this study,  
3 explained a small fraction of the phenotypic variance ( $\sigma^2_{GS1}=0.08$ ,  $\sigma^2_{GS2}=0.09$ ,  $\sigma^2_{GS3}=0.23$ ,  
4 respectively). As expected from previous work (Martin et al., 2017), our results indicate that  
5 genetic risk prediction is strongly affected by population structure. Most of the pigmentation  
6 variability in KhoeSan populations is not explained by previously identified loci, suggesting that  
7 more than 50 loci (and indeed, likely far more, given our genomic heritability estimates) with a  
8 distribution of mostly small effects contribute to variation in pigmentation in the KhoeSan. This  
9 suggests that skin pigmentation is a far more complex trait than previously discussed,  
10 analogous to numerous other complex traits discussed in biomedical literature.

11

### 12 *The Evolution of Skin Pigmentation: Selection and Constraint*

13

14 By aggregating a large set of quantitative skin pigmentation phenotypes (N=4,712) from globally  
15 diverse populations, we have demonstrated heteroskedasticity as a function of latitude. As  
16 observed previously, we find a strong correlation between absolute latitude and average skin  
17 pigmentation reflectance caused by melanin content. We also observe that populations with  
18 lighter skin have reduced variation within any given study: populations furthest from the equator  
19 have narrower distributions, while populations closest to the equator have wider distributions.  
20 These patterns suggest that selection is acting differently at different latitudes. In equatorial  
21 regions, strong directional selection for darker pigmentation has shifted the distribution means in  
22 some populations to M indices greater than 90, but with wide variances. This is consistent with a  
23 'threshold' model (Chaplin, 2004) in which the protective benefit of melanin needs to meet some  
24 minimum threshold but with no penalty to darker pigmentation; alternatively, diversifying  
25 selection could maintain the wide variance.

26

1 In stark contrast, pigmentation in far northern European and Asian populations has been under  
2 directional selection for decreased melanin production, reflected by very narrow distributions.  
3 There may be biological constraints on the lower boundary of skin pigmentation, and/or due to  
4 the strong positive selection acting on a few large-effect alleles, there is little genetic variability  
5 left at these pigmentation loci. This would simplify the genomic architecture, with relatively few  
6 alleles of large effect driving the phenotype, particularly alleles that lighten skin at extreme  
7 northern latitudes, and could explain why prior investigations observed an almost Mendelian  
8 inheritance of large effect light pigmentation alleles.

9  
10 Finally, populations at intermediate latitudes have increased variance and higher means than  
11 populations in northern Eurasia, but less than equatorial populations. The most parsimonious  
12 explanation for this pattern is that stabilizing selection affects the light and dark tails of the  
13 pigmentation distribution (Barton, 1999). The Nama and †Khomani San appear to be two such  
14 instances of this intermediate variation within Africa, likely attributable to their geographic  
15 distance from the equator in far southern Africa (~24-29 degrees South). The observed mean  
16 and variance differences across the full spectrum of skin pigmentation by latitude may be driven  
17 by imbalanced opposing adaptive pressures, where selective forces to produce vitamin D and  
18 protect folate from photolysis are unequal and change in response to UV radiation exposure.  
19 Given our heritability results and the observed variability in baseline pigmentation; light skin  
20 pigmentation in the KhoeSan appears to be due to a combination of many small-effect  
21 mutations as well as some large-effect variants. The evolution of the pigmentation phenotype in  
22 these populations cannot be explained in terms of only a few variants segregating in Eurasians.  
23 A fuller characterization of the genes underlying the architecture in Africans is needed before we  
24 can distinguish between the hypothesis of directional versus stabilizing selection across  
25 different latitudes (Berg and Coop, 2014).

26



## 1 *Conclusion*

2

3 Because African populations often carry the ancestral (i.e. dark) allele for skin pigmentation  
4 genes identified in Eurasians, allusions to African skin pigmentation have ignored the great  
5 variability in this phenotype across Africa. Here, we reiterate that skin pigmentation varies more  
6 in Africa than any other continent, and we show that pigmentation in African populations cannot  
7 simply be explained by the small number of large effect alleles discovered in Eurasians. Even in  
8 light to moderately pigmented KhoeSan populations, the polygenicity of skin pigmentation is  
9 much greater than Eurasians, encompassing both known pigmentation genes as well as novel  
10 loci. We argue that the distributions of skin pigmentation globally suggest different forces of  
11 selection operating at various latitudes. To better understand baseline pigmentation, one of the  
12 most rapidly-evolving traits and strongest cases for positive selection in humans, it is essential  
13 to quantitatively measure and study pigmentation in a large set of genetically diverged  
14 populations that have historically been exposed to different levels of UV radiation. As human  
15 genetics moves to ever larger studies of complex traits (Wood et al., 2014), the full picture of  
16 genetic architecture will remain incomplete without representation from diverse worldwide  
17 populations.

18

## 19 **Author Contributions**

20 BMH, CRG, MWF, and CDB conceived of and designed the study. ARM and AS designed  
21 experiments. ARM, MS and AS performed experiments. ARM, JMG, ML, EGA and XL analyzed  
22 data. BMH, CRG, CJW, JWM, ARM, JMG, and MM collected samples and measured skin  
23 photometrics. EGH, CRG, DMK, MWF, CDB, and BMH supervised the study. ARM and BMH  
24 wrote the manuscript with input from ML, JMG, MM, DMK, EGH, MWF, and CRG. All authors  
25 read and approved of the final version of the manuscript.

26

## 1 **Acknowledgments**

2 We thank the Beijing Genome Institute and Agilent Technologies for sequencing support. We  
3 thank George Chaplin and Nina Jablonski for providing summary statistics for baseline  
4 pigmentation in the Xhosa and Cape Coloured populations. We thank Sandra Beleza, Heather  
5 Norton, Esteban Parra, Chandana Basu Mallick, Andres Moreno-Estrada and Karla Sandoval,  
6 Richard Cooper, Sophie Candille, and their colleagues for providing quantitative phenotypes  
7 from their pigmentation work. We thank Catherine Guenther for discussing molecular strategies  
8 for functional followup. We would also like to thank the Working Group of Indigenous Minorities  
9 in Southern Africa (WIMSA), community leaders and the South African San Institute (SASI) for  
10 their advice and oversight. Finally, we thank Richard Jacobs, Wilhelmina Mondzinger, Hans  
11 Padmaker, Willem de Klerk, Hendrik Kaiman, and the communities in which we have sampled;  
12 without their support, this study would not have been possible. Funding for this project was  
13 provided by a Stanford University CDEHA seed grant (NIH, NIA P30 AG017253-12) to BMH and  
14 by a trainee research grant to ARM by the Stanford Center for Computational, Evolutionary, and  
15 Human Genomics. Funding was also provided by the Morrison Institute for Population Studies,  
16 Stanford University. Funding for genotyping additional KhoeSan individuals was provided by the  
17 Stanford Center for Computational, Evolutionary, and Human Genomics. ARM was funded by  
18 NIH Genetics and Developmental Biology Training Program T32 GM07790. EA was supported  
19 by an NIH IRACDA fellowship to Stony Brook University. CRG was supported by the Stanford  
20 Genome Training Program 5T32HG000044. CJW, MM and EGH are partly supported by the  
21 South African Medical Research Council. The content is solely the responsibility of the authors  
22 and does not necessarily represent the official views of the South African Medical Research  
23 Council.

24

## 25 **Conflicts of Interest**

1 CRG and BMH own stock in 23andMe, Inc. CRG is a member of the scientific advisory board  
2 and academic founder for Encompass Bioscience, Inc. JAG is an employee of AncestryDNA.  
3 CDB is a member of the scientific advisory board for Liberty Biosecurity, Personalis, Inc.,  
4 23andMe Roots into the Future, Ancestry.com, IdentifyGenomics, LLC, Etalon, Inc., and is a  
5 founder of CDB Consulting, LTD. All other authors declare that they have no competing  
6 interests.

7  
8

## 1   **References**

- 2
- 3   Alexander, D.H., Novembre, J., and Lange, K. (2009). Fast model-based estimation of ancestry  
4   in unrelated individuals. *Genome research* 19, 1655-664.
- 5   Alkorta-Aranburu, G., Beall, C.M., Witonsky, D.B., Gebremedhin, A., Pritchard, J.K., and Di  
6   Rienzo, A. (2012). The genetic architecture of adaptations to high altitude in Ethiopia. *PLoS*  
7   *Genet* 8, e1003110.
- 8   Almasy, L., and Blangero, J. (1998). Multipoint quantitative-trait linkage analysis in general  
9   pedigrees. *The American Journal of Human Genetics* 62, 1198-1211.
- 10   Barton, N.H. (1999). Clines in polygenic traits. *Genetical research* 74, 223-236.
- 11   Basu Mallick, C., Iliescu, F.M., Möls, M., Hill, S., Tamang, R., Chaubey, G., Goto, R., Ho,  
12   S.Y.W., Gallego Romero, I., et al. (2013). The light skin allele of SLC24A5 in South Asians and  
13   Europeans shares identity by descent. *PLoS Genet* 9, e1003912.
- 14   Beleza, S., Santos, A.M., McEvoy, B., Alves, I., Martinho, C., Cameron, E., Shriver, M.D., Parra,  
15   E.J., and Rocha, J. (2013a). The timing of pigmentation lightening in Europeans. *Mol Biol Evol*  
16   30, 24-35.
- 17   Beleza, S., Johnson, N.A., Candille, S.I., Absher, D.M., Coram, M.A., Lopes, J., Campos, J.,  
18   Araújo, I.I., Anderson, T.M., et al. (2013b). Genetic Architecture of Skin and Eye Color in an  
19   African-European Admixed Population. *PLoS Genet* 9, e1003372.
- 20   Berg, J.J., and Coop, G. (2014). A Population Genetic Signal of Polygenic Adaptation. *PLoS*  
21   *Genet* 10, e1004412.
- 22   Berg, J.J., and Coop, G. (2014). A Population Genetic Signal of Polygenic Adaptation. *PLoS*  
23   *Genet* 10, e1004412.
- 24   Byard, P.J. (1981). Quantitative genetics of human skin color. *American Journal of Physical*  
25   *Anthropology* 24, 123-137.
- 26   Candille, S.I., Absher, D.M., Beleza, S., Bauchet, M., McEvoy, B., Garrison, N.A., Li, J.Z.,  
27   Myers, R.M., Barsh, G.S., et al. (2012). Genome-wide association studies of quantitatively  
28   measured skin, hair, and eye pigmentation in four European populations. *PLoS One* 7, e48294.
- 29   Carlson, C.S., Matisse, T.C., North, K.E., Haiman, C.A., Fesinmeyer, M.D., Buyske, S.,  
30   Schumacher, F.R., Peters, U., Franceschini, N., et al. (2013). Generalization and dilution of  
31   association results from European GWAS in populations of non-European ancestry: the PAGE  
32   study. *PLoS Biol* 11, e1001661.
- 33   Chaplin, G. (2004). Geographic distribution of environmental factors influencing human skin  
34   coloration. *American Journal of Physical Anthropology* 125, 292-302.
- 35   Chaplin, G., and Jablonski, N.G. (2009). Vitamin D and the evolution of human depigmentation.  
36   *American journal of physical anthropology* 139, 451-461.
- 37   Clark, P., Stark, A.E., Walsh, R.J., Jardine, R., and Martin, N.G. (1981). A twin study of skin  
38   reflectance. *Annals of Human Biology* 8, 529-541.
- 39   Coussens, A.K., Naude, C.E., Goliath, R., Chaplin, G., Wilkinson, R.J., and Jablonski, N.G.  
40   (2015). High-dose vitamin D <sup>3</sup> reduces deficiency caused by low UVB exposure  
41   and limits HIV-1 replication in urban Southern Africans. *Proceedings of the National Academy of*  
42   *Sciences* , 201500909.
- 43   Crawford, N. G., et al. (2017). Loci associated with skin pigmentation identified in African  
44   populations. *Science*

- 1 Demir, K., Kirsch, N., Beretta, C.A., Erdmann, G., Ingelfinger, D., Moro, E., Argenton, F., Carl,  
2 M., Niehrs, C., and Boutros, M. (2013). RAB8B is required for activity and caveolar endocytosis  
3 of LRP6. *Cell reports* 4, 1224-234.
- 4 Diffey, B.L., Oliver, R.J., and Farr, P.M. (1984). A portable instrument for quantifying erythema  
5 induced by ultraviolet radiation. *British Journal of Dermatology* 111, 663-672.
- 6 Duan, S., Huang, R.S., Zhang, W., Mi, S., Bleibel, W.K., Kistner, E.O., Cox, N.J., and Dolan,  
7 M.E. (2009). Expression and alternative splicing of folate pathway genes in HapMap  
8 lymphoblastoid cell lines. *Pharmacogenomics* 10, 549-563.
- 9 Duffy, D.L., Montgomery, G.W., Chen, W., Zhao, Z.Z., Le, L., James, M.R., Hayward, N.K.,  
10 Martin, N.G., and Sturm, R.A. (2007). A three-single-nucleotide polymorphism haplotype in  
11 intron 1 of OCA2 explains most human eye-color variation. *Am J Hum Genet* 80, 241-252.
- 12 Durazo-Arvizu, R.A., Camacho, P., Bovet, P., Forrester, T., Lambert, E.V., Plange-Rhule, J.,  
13 Hoofnagle, A.N., Aloia, J., Tayo, B., et al. (2014). 25-Hydroxyvitamin D in African-origin  
14 populations at varying latitudes challenges the construct of a physiologic norm. *The American*  
15 *journal of clinical nutrition* 100, 908-914.
- 16 Edwards, M., Bigham, A., Tan, J., Li, S., Gozdzik, A., Ross, K., Jin, L., and Parra, E.J. (2010).  
17 Association of the OCA2 polymorphism His615Arg with melanin content in east Asian  
18 populations: further evidence of convergent evolution of skin pigmentation. *PLoS Genet* 6,  
19 e1000867.
- 20 Eriksson, N., Macpherson, J.M., Tung, J.Y., Hon, L.S., Naughton, B., Saxonov, S., Avey, L.,  
21 Wojcicki, A., Pe'er, I., and Mountain, J. (2010). Web-based, participant-driven studies yield  
22 novel genetic associations for common traits. *PLoS Genet* 6, 1-20.
- 23 Frisancho, A.R., Wainwright, R., and Way, A. (1981). Heritability and components of phenotypic  
24 expression in skin reflectance of Mestizos from the Peruvian lowlands. *American journal of*  
25 *physical anthropology* 55, 203-08.
- 26 Genovese, G., Friedman, D.J., Ross, M.D., Lecordier, L., Uzureau, P., Freedman, B.I., Bowden,  
27 D.W., Langefeld, C.D., Oleksyk, T.K., et al. (2010). Association of Trypanolytic ApoL1 Variants  
28 with Kidney Disease in African Americans. *Science* 329, 841-45.
- 29 Gravel, S., Zakharia, F., Moreno-Estrada, A., Byrnes, J.K., Muzzio, M., Rodriguez-Flores, J.L.,  
30 Kenny, E.E., Gignoux, C.R., Maples, B.K., et al. (2013). Reconstructing Native American  
31 migrations from whole-genome and whole-exome data. *PLoS Genet* 9, e1004023.
- 32 Gronau, I., Hubisz, M.J., Gulko, B., Danko, C.G., and Siepel, A. (2011). Bayesian inference of  
33 ancient human demography from individual genome sequences. *Nat Genet*
- 34 Gusev, A., Lee, S.H., Trynka, G., Finucane, H., Vilhjálmsón, B., Xu, H., Zang, C., Ripke, S.,  
35 Bulik-Sullivan, B., et al. (2014). Partitioning Heritability of Regulatory and Cell-Type-Specific  
36 Variants across 11 Common Diseases. *The American Journal of Human Genetics* 95, 535-552.
- 37 Harrison, G.A., and Owen, J.J. (1964). Studies on the Inheritance of Human Skin Colour.  
38 *Annals of human genetics* 28, 27-37.
- 39 Hart, K.L., Kimura, S.L., Mushailov, V., Budimlija, Z.M., Prinz, M., and Wurmbach, E. (2013).  
40 Improved eye- and skin-color prediction based on 8 SNPs. *Croatian medical journal* 54, 248-  
41 256.
- 42 Henn, B.M., Gignoux, C.R., Jobin, M., Granka, J.M., Macpherson, J.M., Kidd, J.M., Rodríguez-  
43 Botigué, L., Ramachandran, S., Hon, L., et al. (2011). Hunter-gatherer genomic diversity

- 1 suggests a southern African origin for modern humans. *Proc Natl Acad Sci U S A* 108, 5154-  
2 162.
- 3 Izagirre, N., García, I., Junquera, C., de la Rúa, C., and Alonso, S. (2006). A scan for signatures  
4 of positive selection in candidate loci for skin pigmentation in humans. *Mol Biol Evol* 23, 1697-  
5 1706.
- 6 Jablonski, N.G., and Chaplin, G. (2010). Colloquium paper: human skin pigmentation as an  
7 adaptation to UV radiation. *Proc Natl Acad Sci U S A* 107 *Suppl* , 8962-68.
- 8 Jablonski, N.G., and Chaplin, G. (2014). The Evolution of Skin Pigmentation and Hair Texture in  
9 People of African Ancestry. *Dermatologic Clinics* 32, 113-121.
- 10 Jin, Y., Birlea, S.A., Fain, P.R., Gowan, K., Riccardi, S.L., Holland, P.J., Mailloux, C.M., Sufit,  
11 A.J.D., Hutton, S.M., et al. (2010). Variant of TYR and autoimmunity susceptibility loci in  
12 generalized vitiligo. *The New England journal of medicine* 362, 1686-697.
- 13 Kayser, M., Liu, F., Janssens, A.C.J., Rivadeneira, F., Lao, O., van Duijn, K., Vermeulen, M.,  
14 Arp, P., Jhamai, M.M., et al. (2008). Three Genome-wide Association Studies and a Linkage  
15 Analysis Identify HERC2 as a Human Iris Color Gene. *The American Journal of Human*  
16 *Genetics* 82, 411-423.
- 17 Keenen, B., Qi, H., Saladi, S.V., Yeung, M., and de la Serna, I.L. (2010). Heterogeneous  
18 SWI/SNF chromatin remodeling complexes promote expression of microphthalmia-associated  
19 transcription factor target genes in melanoma. *Oncogene* 29, 81-92.
- 20 Kenny, E.E., Timpson, N.J., Sikora, M., Yee, M., Moreno-Estrada, A., Eng, C., Huntsman, S.,  
21 Burchard, E.G., Stoneking, M., et al. (2012). Melanesian blond hair is caused by an amino acid  
22 change in TYRP1. *Science* 336, 554.
- 23 Lamason, R.L., Mohideen, M.P.K., Mest, J.R., Wong, A.C., Norton, H.L., Aros, M.C., Juryneec,  
24 M.J., Mao, X., Humphreville, V.R., et al. (2005). SLC24A5, a putative cation exchanger, affects  
25 pigmentation in zebrafish and humans. *Science* 310, 1782-86.
- 26 Lao, O., de Gruijter, J.M., van Duijn, K., Navarro, A., and Kayser, M. (2007). Signatures of  
27 positive selection in genes associated with human skin pigmentation as revealed from analyses  
28 of single nucleotide polymorphisms. *Annals of human genetics* 71, 354-369.
- 29 de la Serna, I.L., Ohkawa, Y., Higashi, C., Dutta, C., Osias, J., Kommajosyula, N., Tachibana,  
30 T., and Imbalzano, A.N. (2006). The microphthalmia-associated transcription factor requires  
31 SWI/SNF enzymes to activate melanocyte-specific genes. *The Journal of biological chemistry*  
32 281, 20233-241.
- 33 Li, J.Z., Absher, D.M., Tang, H., Southwick, A.M., Casto, A.M., Ramachandran, S., Cann, H.M.,  
34 Barsh, G.S., Feldman, M., et al. (2008). Worldwide human relationships inferred from genome-  
35 wide patterns of variation. *Science* 319, 1100-04.
- 36 Liu, F., Visser, M., Duffy, D.L., Hysi, P.G., Jacobs, L.C., Lao, O., Zhong, K., Walsh, S.,  
37 Chaitanya, L., et al. (2015). Genetics of skin color variation in Europeans: genome-wide  
38 association studies with functional follow-up. *Human Genetics* 134, 823-835.
- 39 Liu, J.Z., van Sommeren, S., Huang, H., Ng, S.C., Alberts, R., Takahashi, A., Ripke, S., Lee,  
40 J.C., Jostins, L., et al. (2015). Association analyses identify 38 susceptibility loci for  
41 inflammatory bowel disease and highlight shared genetic risk across populations. *Nat Genet* 47,  
42 979-986.
- 43 Liu-Smith, F., Dellinger, R., and Meyskens, F.L. (2014). Updates of reactive oxygen species in  
44 melanoma etiology and progression. *Archives of biochemistry and biophysics*

- 1 Luca, F., Hudson, R.R., Witonsky, D.B., and Di Rienzo, A. (2011). A reduced representation  
2 approach to population genetic analyses and applications to human evolution. *Genome*  
3 *Research* 21, 1087-098.
- 4 Marcheco-Teruel, B., Parra, E.J., Fuentes-Smith, E., Salas, A., Buttenschön, H.N., Demontis,  
5 D., Torres-Español, M., Marín-Padrón, L.C., Gómez-Cabezas, E.J., et al. (2014). Cuba:  
6 exploring the history of admixture and the genetic basis of pigmentation using autosomal and  
7 uniparental markers. *PLoS Genet* 10, e1004488.
- 8 Martin, A.R., Gignoux, C.R., Walters, R.K., Wojcik, G.L., Neale, B.M., Gravel, S., Daly, M.J.,  
9 Bustamante, C.D., and Kenny, E.E. (2017). Human Demographic History Impacts Genetic Risk  
10 Prediction across Diverse Populations. *The American Journal of Human Genetics*
- 11 McEvoy, B., Beleza, S., and Shriver, M.D. (2006). The genetic architecture of normal variation in  
12 human pigmentation: an evolutionary perspective and model. *Human molecular genetics* 15  
13 *Spec No*, R176-181.
- 14 Miller, C.T., Beleza, S., Pollen, A.A., Schluter, D., Kittles, R.A., Shriver, M.D., and Kingsley,  
15 D.M. (2007). cis-Regulatory changes in Kit ligand expression and parallel evolution of  
16 pigmentation in sticklebacks and humans. *Cell* 131, 1179-189.
- 17 Moltke, I., and Albrechtsen, A. (2013). RelateAdmix: a software tool for estimating relatedness  
18 between admixed individuals. *Bioinformatics* , 1-2.
- 19 Nan, H., Kraft, P., Qureshi, A.A., Guo, Q., Chen, C., Hankinson, S.E., Hu, F.B., Thomas, G.,  
20 Hoover, R.N., et al. (2009). Genome-wide association study of tanning phenotype in a  
21 population of European ancestry. *The Journal of investigative dermatology* 129, 2250-57.
- 22 Norton, H.L., Friedlaender, J.S., Merriwether, D.A., Koki, G., Mgone, C.S., and Shriver, M.D.  
23 (2006). Skin and hair pigmentation variation in Island Melanesia. *American journal of physical*  
24 *anthropology* 130, 254-268.
- 25 Norton, H.L., Kittles, R.A., Parra, E., McKeigue, P., Mao, X., Cheng, K., Canfield, V.A., Bradley,  
26 D.G., McEvoy, B., and Shriver, M.D. (2007). Genetic evidence for the convergent evolution of  
27 light skin in Europeans and East Asians. *Mol Biol Evol* 24, 710-722.
- 28 Paik, S.H., Kim, H., Son, H., Lee, S., Im, S., Ju, Y.S., Yeon, J.H., Jo, S.J., Eun, H.C., et al.  
29 (2012). Gene mapping study for constitutive skin color in an isolated Mongolian population.  
30 *Experimental & molecular medicine* 44, 241-49.
- 31 Pickrell, J.K., Patterson, N., Barbieri, C., Berthold, F., Gerlach, L., Güldemann, T., Kure, B.,  
32 Mpoloka, S.W., Nakagawa, H., et al. (2012). The genetic prehistory of southern Africa. *Nat*  
33 *Commun* 3, 1143.
- 34 Pickrell, J.K., Patterson, N., Loh, P.-, Lipson, M., Berger, B., Stoneking, M., Pakendorf, B., and  
35 Reich, D. (2014). Ancient west Eurasian ancestry in southern and eastern Africa. *Proceedings*  
36 *of the National Academy of Sciences* , 1-6.
- 37 Pośpiech, E., Wojas-Pelc, A., Walsh, S., Liu, F., Maeda, H., Ishikawa, T., Skowron, M., Kayser,  
38 M., and Branicki, W. (2014). The common occurrence of epistasis in the determination of human  
39 pigmentation and its impact on DNA-based pigmentation phenotype prediction. *Forensic*  
40 *Science International: Genetics* 11, 64-72.
- 41 Prado-Martinez, J., Sudmant, P.H., Kidd, J.M., Li, H., Kelley, J.L., Lorente-Galdos, B.,  
42 Veeramah, K.R., Woerner, A.E., O'Connor, T.D., et al. (2013). Great ape genetic diversity and  
43 population history. *Nature* , 1-5.

- 1 Praetorius, C., Grill, C., Stacey, S.N., Metcalf, A.M., Gorkin, D.U., Robinson, K.C., Van Otterloo,  
2 E., Kim, R.S.Q., Bergsteinsdottir, K., et al. (2013). A polymorphism in IRF4 affects human  
3 pigmentation through a tyrosinase-dependent MITF/TFAP2A pathway. *Cell* 155, 1022-033.
- 4 Ramachandran, S., Deshpande, O., Roseman, C.C., Rosenberg, N.A., Feldman, M.W., and  
5 Cavalli-Sforza, L.L. (2005). Support from the relationship of genetic and geographic distance in  
6 human populations for a serial founder effect originating in Africa. *Proc Natl Acad Sci U S A*  
7 102, 15942-47.
- 8 Relethford, J.H. (2000). Human skin color diversity is highest in sub-Saharan African  
9 populations. *Human biology* 72, 773-780.
- 10 Sabeti, P.C., Varilly, P., Fry, B., Lohmueller, J., Hostetter, E., Cotsapas, C., Xie, X., Byrne, E.H.,  
11 McCarroll, S.A., et al. (2007). Genome-wide detection and characterization of positive selection  
12 in human populations. *Nature* 449, 913-18.
- 13 Sarangarajan, R., and Boissy, R.E. (2001). Tyrp1 and oculocutaneous albinism type 3. *Pigment*  
14 *cell research / sponsored by the European Society for Pigment Cell Research and the*  
15 *International Pigment Cell Society* 14, 437-444.
- 16 Schizophrenia Working Group of the Psychiatric Genomics Consortium (2014). Biological  
17 insights from 108 schizophrenia-associated genetic loci. *Nature* 511, 421-27.
- 18 Schlebusch, C.M., Skoglund, P., Sjödin, P., Gattepaille, L.M., Hernandez, D., Jay, F., Li, S., De  
19 Jongh, M., Singleton, A., et al. (2012). Genomic Variation in Seven Khoe-San Groups Reveals  
20 Adaptation and Complex African History. *Science* 374
- 21 Soejima, M., and Koda, Y. (2007). Population differences of two coding SNPs in pigmentation-  
22 related genes SLC24A5 and SLC45A2. *International Journal of Legal Medicine* 121, 36-39.
- 23 Soejima, M., Tachida, H., Ishida, T., Sano, A., and Koda, Y. (2006). Evidence for recent positive  
24 selection at the human AIM1 locus in a European population. *Mol Biol Evol* 23, 179-188.
- 25 Spichenok, O., Budimilija, Z.M., Mitchell, A.A., Jenny, A., Kovacevic, L., Marjanovic, D.,  
26 Caragine, T., Prinz, M., and Wurmbach, E. (2011). Prediction of eye and skin color in diverse  
27 populations using seven SNPs. *Forensic Science International: Genetics* 5, 472-78.
- 28 Sturm, R.A. (2009). Molecular genetics of human pigmentation diversity. *Human molecular*  
29 *genetics* 18, R9-17.
- 30 Sturm, R.A., and Duffy, D.L. (2012). Human pigmentation genes under environmental selection.  
31 Sulem, P., Gudbjartsson, D.F., Stacey, S.N., Helgason, A., Rafnar, T., Jakobsdottir, M.,  
32 Steinberg, S., Gudjonsson, S.A., Palsson, A., et al. (2008). Two newly identified genetic  
33 determinants of pigmentation in Europeans. *Nat Genet* 40, 835-37.
- 34 Sulem, P., Gudbjartsson, D.F., Stacey, S.N., Helgason, A., Rafnar, T., Magnusson, K.P.,  
35 Manolescu, A., Karason, A., Palsson, A., et al. (2007). Genetic determinants of hair, eye and  
36 skin pigmentation in Europeans. *Nat Genet* 39, 1443-452.
- 37 Thornton, T., Tang, H., Hoffmann, T.J., Ochs-Balcom, H.M., Caan, B.J., and Risch, N. (2012).  
38 Estimating kinship in admixed populations. *Am J Hum Genet* 91, 122-138.
- 39 Tishkoff, S.A., Gonder, M.K., Henn, B.M., Mortensen, H., Knight, A., Gignoux, C.,  
40 Fernandopulle, N., Lema, G., Nyambo, T.B., et al. (2007). History of Click-Speaking Populations  
41 of Africa Inferred from mtDNA and Y Chromosome Genetic Variation. *Mol Biol Evol* 24, 2180-  
42 195.



- 1 Tishkoff, S.A., Reed, F.A., Friedlaender, F.R., Ehret, C., Ranciaro, A., Froment, A., Hirbo, J.B.,  
2 Awomoyi, A.A., Bodo, J., et al. (2009). The genetic structure and history of Africans and African  
3 Americans. *Science* 324, 1035-044.
- 4 Uren, C., Kim, M., Martin, A.R., Bobo, D., Gignoux, C.R., van Helden, P.D., Moller, M., Hoal,  
5 E.G., and Henn, B.M. (2016). Fine-Scale Human Population Structure in Southern Africa  
6 Reflects Ecogeographic Boundaries. *Genetics* 204, 303-314.
- 7 Vachtenheim, J., Ondrušová, L., and Borovanský, J. (2010). SWI/SNF chromatin remodeling  
8 complex is critical for the expression of microphthalmia-associated transcription factor in  
9 melanoma cells. *Biochemical and Biophysical Research Communications* 392, 454-59.
- 10 Veeramah, K.R., Wegmann, D., Woerner, A., Mendez, F.L., Watkins, J.C., Destro-Bisol, G.,  
11 Soodyall, H., Louie, L., and Hammer, M.F. (2012). An Early Divergence of KhoeSan Ancestors  
12 from Those of Other Modern Humans Is Supported by an ABC-Based Analysis of Autosomal  
13 Resequencing Data. *Mol Biol Evol* 29, 617-630.
- 14 Voight, B.F., Kudaravalli, S., Wen, X., and Pritchard, J.K. (2006). A map of recent positive  
15 selection in the human genome. *PLoS Biol* 4, e72.
- 16 Walsh, S., Liu, F., Wollstein, A., Kovatsi, L., Ralf, A., Kosiniak-Kamysz, A., Branicki, W., and  
17 Kayser, M. (2013). The HirisPlex system for simultaneous prediction of hair and eye colour from  
18 DNA. *Forensic Science International: Genetics* 7, 98-115.
- 19 Wilde, S., Timpson, A., Kirsanow, K., Kaiser, E., Kayser, M., Unterländer, M., Hollfelder, N.,  
20 Potekhina, I.D., Schier, W., et al. (2014). Direct evidence for positive selection of skin, hair, and  
21 eye pigmentation in Europeans during the last 5,000 y. *Proc Natl Acad Sci U S A* 111, 4832-37.
- 22 Wood, A.R., Esko, T., Yang, J., Vedantam, S., Pers, T.H., Gustafsson, S., Chu, A.Y., Estrada,  
23 K., Luan, J., et al. (2014). Defining the role of common variation in the genomic and biological  
24 architecture of adult human height. *Nat Genet* 46, 1173-186.
- 25 Xia, C., Lu, E., Zeng, J., and Gong, X. (2013). Deletion of LRP5 in VLDLR Knockout Mice  
26 Inhibits Retinal Neovascularization. *PLoS One* 8, e75186.
- 27 Yang, Z., Zhong, H., Chen, J., Zhang, X., Zhang, H., Luo, X., Xu, S., Chen, H., Lu, D., et al.  
28 (2016). A Genetic Mechanism for Convergent Skin Lightening during Recent Human Evolution.  
29 *Mol Biol Evol* 33, 1177-187.
- 30 Yi, X., Liang, Y., Huerta-Sanchez, E., Jin, X., Cuo, Z.X.P., Pool, J.E., Xu, X., Jiang, H.,  
31 Vinckenbosch, N., et al. (2010). Sequencing of 50 human exomes reveals adaptation to high  
32 altitude. *Science* 329, 75-78.
- 33 Zaidi, A.A., Mattern, B.C., Claes, P., McEcoy, B., Hughes, C., and Shriver, M.D. (2017).  
34 Investigating the case of human nose shape and climate adaptation. *PLoS Genet* 13,  
35 e1006616.
- 36 Zaitlen, N., Kraft, P., Patterson, N., Pasaniuc, B., Bhatia, G., Pollack, S., and Price, A.L. (2013).  
37 Using extended genealogy to estimate components of heritability for 23 quantitative and  
38 dichotomous traits. *PLoS Genet* 9, e1003520.
- 39 Zaitlen, N., Pasaniuc, B., Sankararaman, S., Bhatia, G., Zhang, J., Gusev, A., Young, T.,  
40 Tandon, A., Pollack, S., et al. (2014). Leveraging population admixture to characterize the  
41 heritability of complex traits. *Nat Genet* 46, 1356-362.
- 42 Zhou, D., Udpa, N., Ronen, R., Stobdan, T., Liang, J., Appenzeller, O., Zhao, H., Yin, Y., Du, Y.,  
43 et al. (2013). Whole-Genome Sequencing Uncovers the Genetic Basis of Chronic Mountain  
44 Sickness in Andean Highlanders. *The American Journal of Human Genetics* , 1-11.

1 **Main Figures**

2

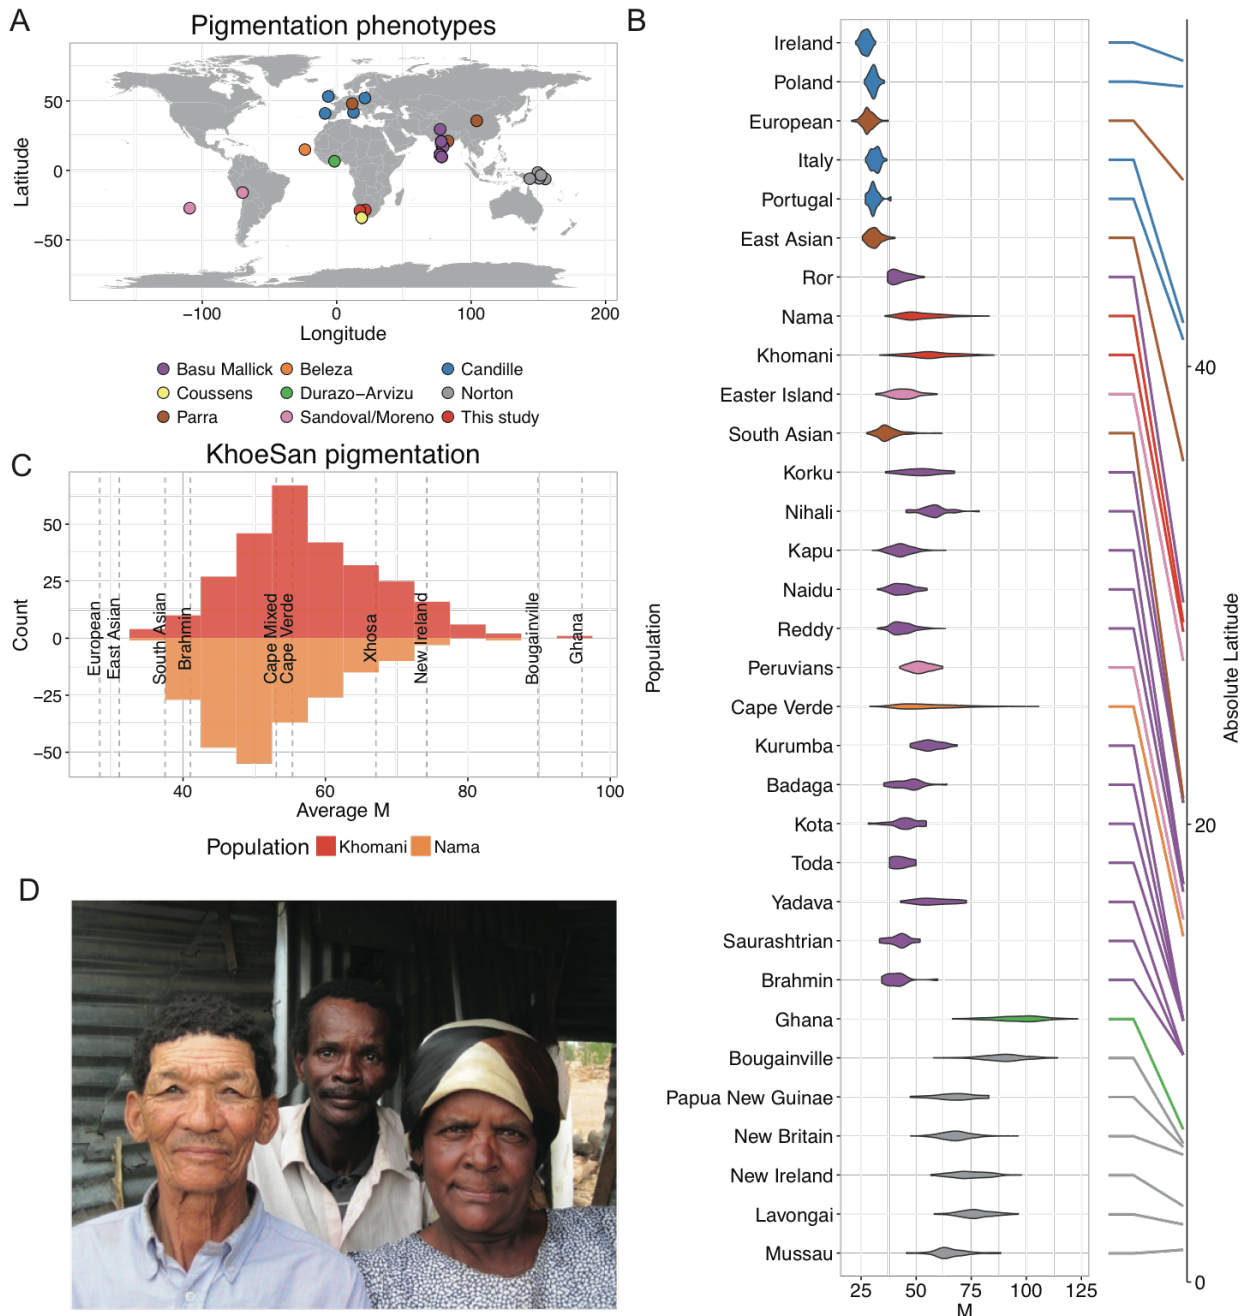

3

4 **Figure 1 – Distributions of baseline pigmentation in globally diverse populations. A)**

5 Sample locations of skin pigmentation datasets where phenotypes were measured with a  
6 DermaSpectrometer I or DermaSpectrometer II. **B)** Violin plots of pigmentation distributions for  
7 32 populations from 8 studies ordered by latitude; absolute latitudes provided on the right.

8 Corresponding datasets are colored as in A). **Table S1** provides summary statistics for each

9 population. M indices are reflectance measures that approximate melanin content. **C)** A

10 comparison of skin pigmentation distributions in  $\pm$ Khomani (top) and Nama populations  
11 (bottom). Dashed grey lines and labels indicate mean M index for the indicated other global  
12 populations. **D)** South African individuals in a household that exemplify the substantial skin

1 pigmentation variability in the †Khomani and Nama populations. Picture taken with consent for  
2 publication.

3

A

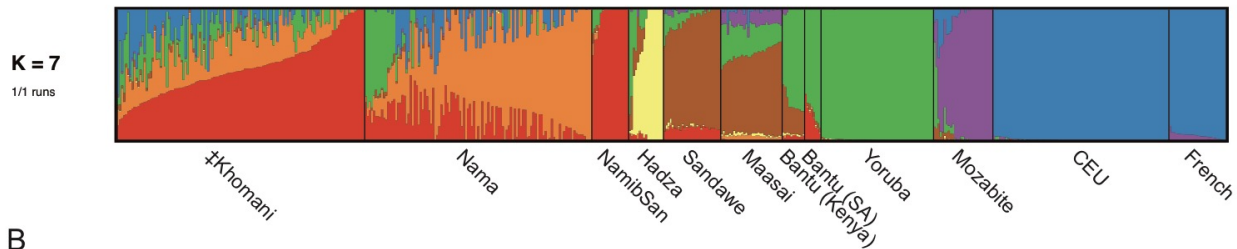

B

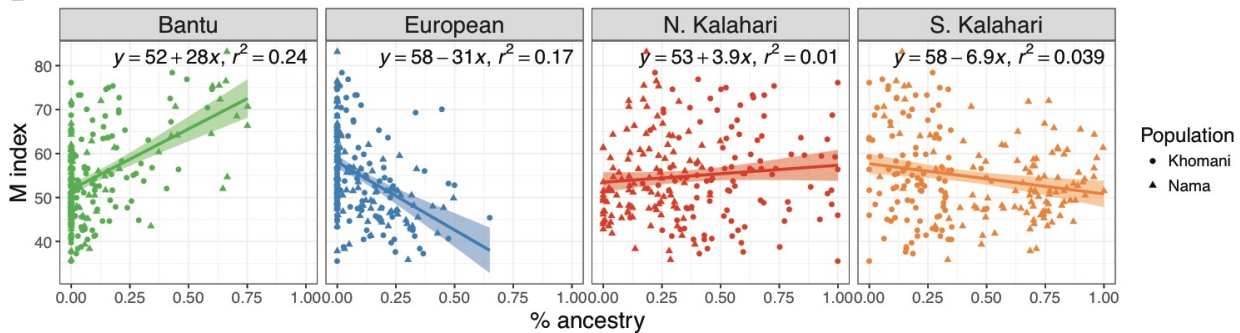

4

5 **Figure 2 – Ancestry components in the KhoeSan and association with pigmentation. A)**

6 ADMIXTURE proportions at  $k=7$  for the †Khomani and Nama populations, using Namibian San,  
7 Hadza, Sandawe, Maasai, Kenyan Bantu, South African (SA) Bantu, Yoruba, Mozabite, Central  
8 Europeans (CEU), and French populations as a reference panel (see also **Figure S2**). **B)**

9 Associations between substantial  $k$  ancestry clusters and average melanin (M index) baseline  
10 pigmentation value in the combined †Khomani and Nama populations. The Bantu and European  
11 components each constitute  $\geq 5\%$  of the total KhoeSan ancestry on average and have  
12 significant associations in the best multivariate model ( $p < 0.05$ ).

13

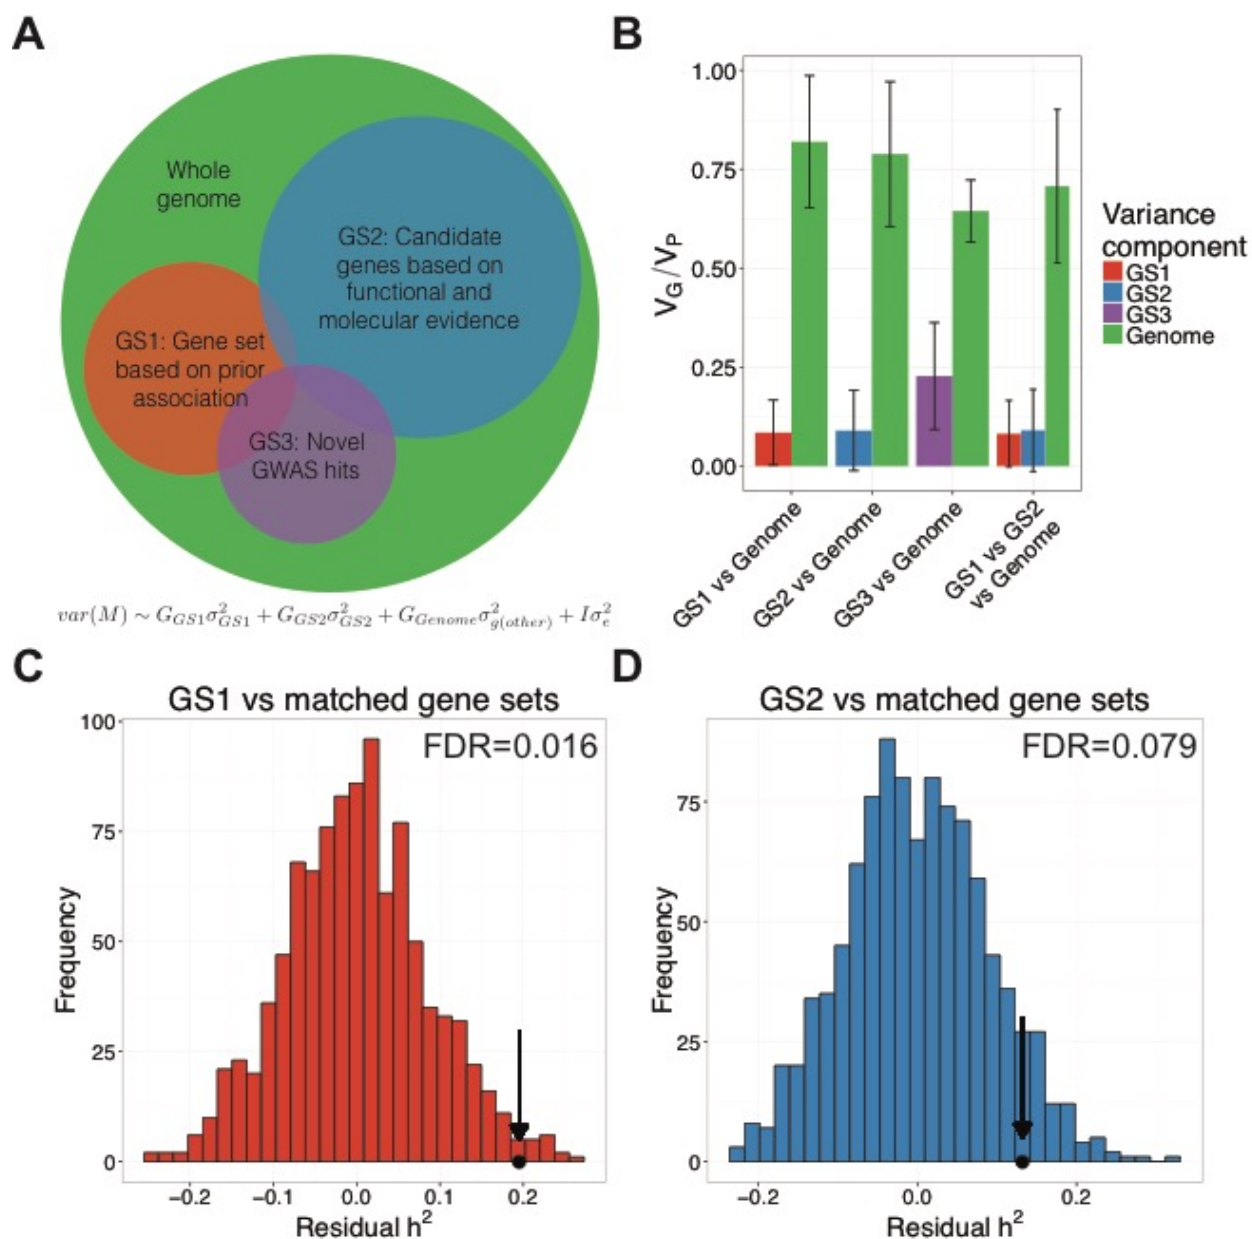

1  
2 **Figure 3 – Partitioned heritability across known and novel gene sets.** Heritable variation in  
3 KhoeSan pigmentation is partially explained by previously associated loci, newly associated  
4 loci, and candidate genes discovered in divergence studies of other populations, and in animal  
5 models. **A)** Schema illustrating how heritability analyses were used to partition the phenotypic  
6 variance explained by candidate gene sets (GS1, GS2) and novel associations (GS3) compared  
7 to the rest of the genome. **B)** Variance components analysis in GCTA comparing pigmentation  
8 variability explained by GS1, GS2, and the rest of the genome. Error bars span  $\pm 1$  standard  
9 error. **C)** Heritability explained by estimated value observed in our data (dot and arrow) versus  
10 matched null distribution in the  $\ddagger$ Khomani and Nama after accounting for number of SNPs in  
11 GS1 gene sets containing 14 genes previously associated with skin pigmentation in other  
12 populations. **D)** As in C), where GS2 = gene set from **Table S4** of (Beleza et al., 2013b)  
13 compiled based on pigmentation function (see also **Figure S3**).  
14

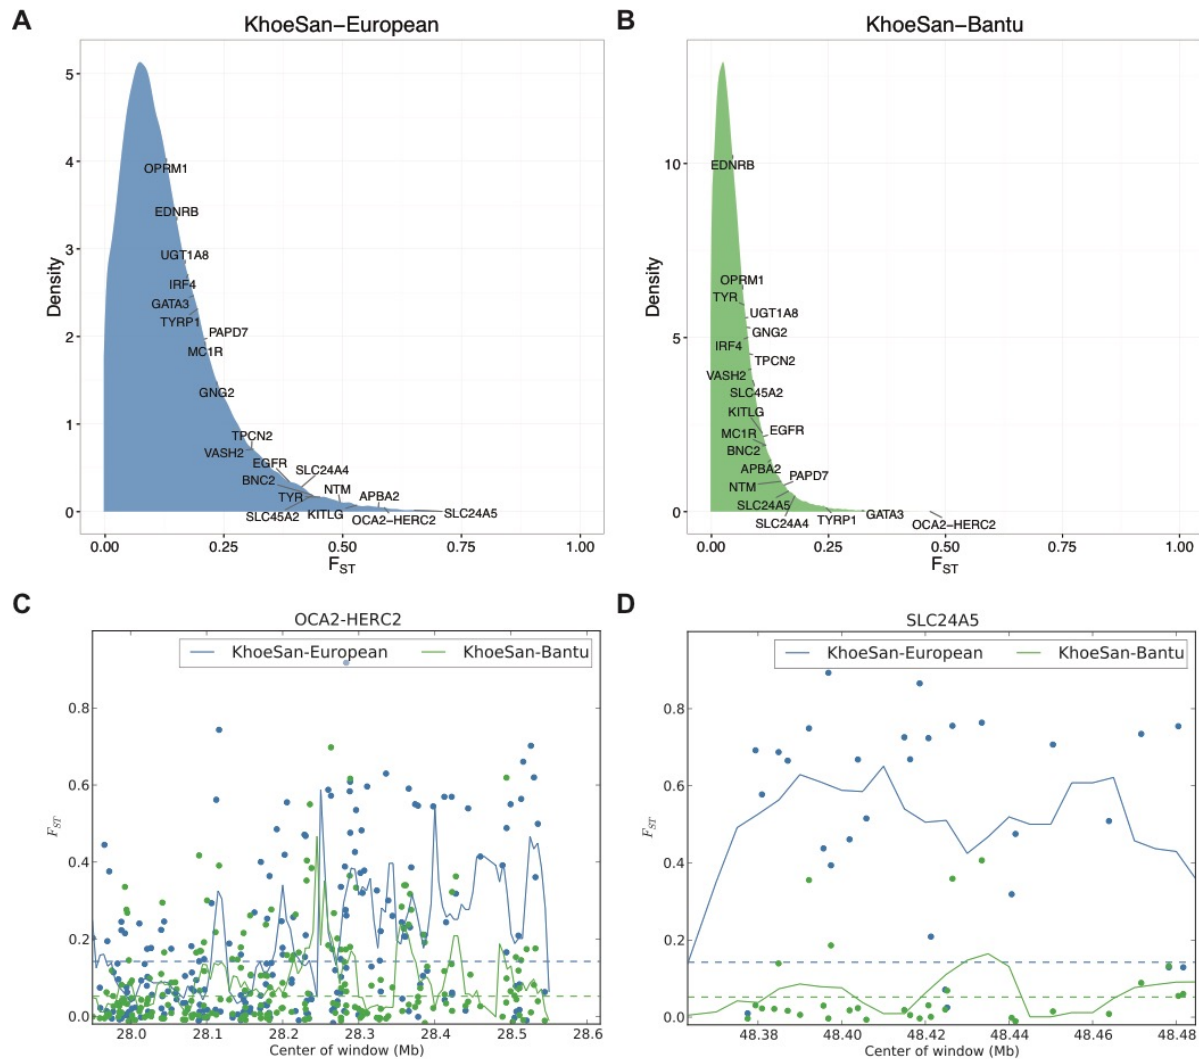

1  
2 **Figure 4 – Genetic divergence in genes previously associated with pigmentation. A-B)**  
3 Distribution of weighted  $F_{ST}$  in 20 kb moving windows of SNPs across the genome with a step  
4 size of 5 kb. Labels indicate where the maximal  $F_{ST}$  window from each canonical pigmentation  
5 gene lies in the distribution. Divergence depicted is between A) the KhoeSan and Europeans,  
6 and B) the KhoeSan and West African populations. C-D)  $F_{ST}$  in canonical pigmentation genes.  
7 Dots indicate SNPs, lines indicate moving averages over 20 kb windows with a step size of 5  
8 kb. Canonical pigmentation loci/genes are shown as: C) the *OCA2-HERC2* locus, and D) the  
9 *SLC24A5* gene.

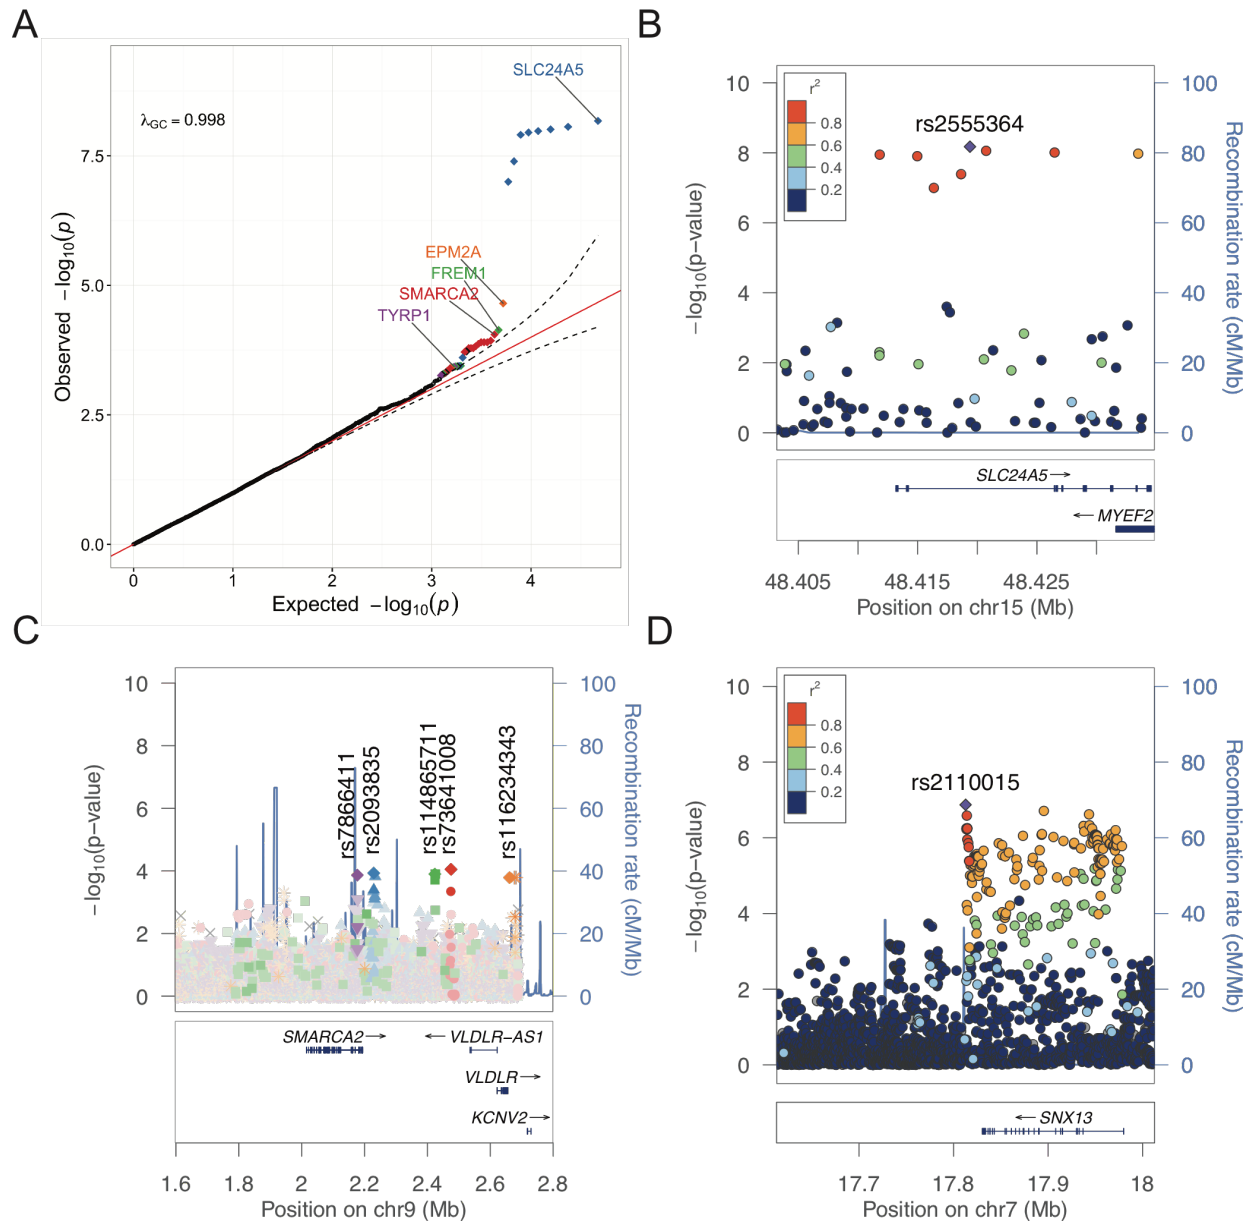

1  
2 **Figure 5 – Associations between genetic data and baseline pigmentation.** Information  
3 regarding targeted resequencing regions is shown in **Table S7**. A) Targeted resequencing QQ  
4 plot. 95% confidence interval on the QQ plot is drawn assuming the  $j^{\text{th}}$  order statistic from a  
5 uniform sample follows a  $Beta(j, n - j + 1)$  distribution. Colors differentiate loci containing more  
6 than one variant associated more significantly than the 95% confidence interval in a region. B-  
7 C) LocusZoom plots of targeted resequencing genetic associations incorporating KhoeSan-  
8 specific LD. Recombination rates are from HapMap b37. Regions include: B) SLC24A5, and C)  
9 5 independent signals associated with  $p < 1e-3$  in/near SMARCA2 and VLDLR. E) LocusZoom  
10 plot of suggestive association in/near SNX13 from meta-analysis of phase 1 and phase 2  
11 **(Figure S7A)** imputed associations with KhoeSan-specific LD.  
12

1 **Main Tables**

2

3 **Table 1 – Heritability estimates contrasting baseline skin pigmentation with tanning**  
4 **status.** SNP-based heritability estimates were computed with GCTA using genetic relationship  
5 matrices (GRMs) calculated from SNP genotypes, an admixture-corrected GRM computed with  
6 REAP, and IBD segments. All models were unconstrained.

| Method    | Dataset        | SNPs    | N   | $h^2$ (SE) baseline pigmentation <sup>a</sup> | $h^2$ (SE) tanning status <sup>b</sup> |
|-----------|----------------|---------|-----|-----------------------------------------------|----------------------------------------|
| GCTA GRM  | genotype array | 286,026 | 216 | 0.90 (0.15)                                   | 0.31 (0.19)                            |
| REAP GRM  | genotype array | 286,026 | 216 | 0.97 (0.15)                                   | 0.41 (0.21)                            |
| $K_{IBD}$ | genotype array | NA      | 216 | 0.97 (0.16)                                   | 0.45 (0.22)                            |
| GCTA GRM  | exome          | 117,132 | 82  | 0.95 (0.26)                                   | 0.37 (0.37)                            |
| SOLAR     | pedigrees      | NA      | 477 | 0.96 (0.12)                                   | 0.19 (0.11)                            |

7 <sup>a</sup> Bantu and European admixture proportions were included as covariates.

8 <sup>b</sup> Age and sex were included as significant covariates for tanning status (wrist minus baseline  
9 underarm pigmentation).

10

11

1 **Table 2 – Replication of previously associated skin pigmentation variants in the joint**  
 2 **‡Khomani and Nama populations.** P-value indicates the joint association across all KhoeSan  
 3 individuals using a linear mixed model accounting for European and Bantu admixture as well as  
 4 kinship. Beta values reflect the effect size of adding one derived allele, assuming an additive  
 5 model, to the distribution of M index (see Figure 1).

| Gene      | rsID       | P-value | Beta  | Derived <sup>a</sup><br>frequency | Allele<br>number <sup>b</sup> | San-<br>specific<br>frequency | San 95%<br>CI <sup>c</sup> | W.<br>AFR <sup>d</sup> | N.<br>EUR <sup>e</sup> |
|-----------|------------|---------|-------|-----------------------------------|-------------------------------|-------------------------------|----------------------------|------------------------|------------------------|
| UGT1A     | rs6742078  | 0.58    | -0.44 | 0.54                              | 460                           | 0.60                          | [0.54,0.69]                | 0.47                   | 0.29                   |
| SLC45A2   | rs35395    | 0.98    | -0.02 | 0.32                              | 882                           | 0.21                          | [0.18,0.25]                | 0.20                   | 0.99                   |
| SLC45A2   | rs16891982 | 1.2E-03 | -2.84 | 0.14                              | 882                           | 0.00                          | [0.00,0.02]                | 0.00                   | 0.98                   |
| IRF4      | rs12203592 | 0.83    | -0.54 | 0.01                              | 882                           | 0.00                          | [0.00,0.00]                | 0.00                   | 0.17                   |
| IRF4      | rs12202284 | 0.51    | 0.99  | 0.04                              | 824                           | 0.00                          | [0.00,0.01]                | 0.15                   | 0.21                   |
| OPRM1     | rs6917661  | 0.29    | -0.71 | 0.66                              | 882                           | 0.71                          | [0.67,0.79]                | 0.61                   | 0.76                   |
| EGFR      | rs12668421 | 0.65    | -0.49 | 0.08                              | 882                           | 0.02                          | [0.01,0.08]                | 0.06                   | 0.27                   |
| TYRP1     | rs13289810 | 0.61    | 0.53  | 0.19                              | 882                           | 0.18                          | [0.11,0.25]                | 0.24                   | 0.34                   |
| BNC2      | rs10756819 | 0.51    | 0.91  | 0.08                              | 466                           | 0.02                          | [0.00,0.05]                | 0.07                   | 0.65                   |
| GATA3     | rs376397   | 0.91    | 0.07  | 0.65                              | 872                           | 0.79                          | [0.75,0.82]                | 0.31                   | 0.32                   |
| GRM5, TYR | rs10831496 | 0.28    | -0.90 | 0.52                              | 460                           | 0.63                          | [0.57,0.70]                | 0.12                   | 0.69                   |
| TYR       | rs1042602  | 0.74    | 0.58  | 0.06                              | 466                           | 0.00                          | [0.00,0.02]                | 0.00                   | 0.38                   |
| KITLG     | rs12821256 | 0.02    | -5.28 | 0.02                              | 882                           | 0.00                          | [0.00,0.01]                | 0.00                   | 0.17                   |
| OCA2      | rs1800404  | 0.53    | -0.40 | 0.55                              | 854                           | 0.65                          | [0.56,0.74]                | 0.11                   | 0.81                   |
| OCA2      | rs7495174  | 0.92    | -0.07 | 0.71                              | 716                           | 0.61                          | [0.55,0.69]                | 0.26                   | 0.90                   |
| HERC2     | rs12913832 | 0.09    | -1.70 | 0.10                              | 882                           | 0.00                          | [0.00,0.02]                | 0.01                   | 0.79                   |
| APBA2     | rs4424881  | 0.25    | -1.24 | 0.18                              | 440                           | 0.02                          | [0.00,0.06]                | 0.07                   | 0.86                   |
| SLC24A5   | rs1426654  | 9.8E-09 | -3.58 | 0.40                              | 882                           | 0.24                          | [0.17,0.32]                | 0.05                   | 1.00                   |
| MC1R      | rs1805007  | 0.80    | -0.64 | 0.01                              | 630                           | 0.00                          | [0.00,0.03]                | 0.00                   | 0.11                   |

6 <sup>a</sup> Derived alleles were determined previously from great ape genome sequencing (Prado-  
 7 Martinez et al., 2013).

8 <sup>b</sup> Allele number indicates the total number of alleles genotyped or sequenced across all  
 9 KhoeSan samples.

10 <sup>c</sup> Confidence interval for the San-specific frequencies indicates the allele frequencies specifically  
 11 on ‡Khomani haplotypes, assessed with local ancestry tracts.

12 <sup>d</sup> W. AFR (western African) allele frequencies were estimated from 405 ESN, GWD, YRI, and  
 13 MSL populations in the phase 3 1000 Genomes project

14 <sup>e</sup> N. EUR (northern Europeans) allele frequencies were estimated from 190 GBR and CEU  
 15 populations in the phase 3 1000 Genomes project
